## Transcriptomes and Raman spectra are linked linearly through a shared low-dimensional subspace

Koseki J. Kobayashi-Kirschvink<sup>1,\*</sup>, Hidenori Nakaoka<sup>1,2</sup>, Arisa Oda<sup>3</sup>, Ken-ichiro F. Kamei<sup>1</sup>, Kazuki Noshō<sup>4</sup>, Hiroko Fukushima<sup>4</sup>, Yu Kanasaki<sup>5,6</sup>, Shunsuke Yajima<sup>5,7</sup>, Haruhiko Masaki<sup>4</sup>, Kunihiro Ohta<sup>2,3,8</sup>, Yuichi Wakamoto<sup>1,2,8,\*</sup>

**1 Department of Basic Science, Graduate School of Arts and Sciences, The University of Tokyo**

**2 Research Center for Complex Systems Biology, The University of Tokyo**

**3 Department of Life Sciences, Graduate School of Arts and Sciences, The University of Tokyo**

**4 Department of Biotechnology, Graduate School of Agricultural and Life Sciences, The University of Tokyo**

**5 NODAI Genome Research Center, Tokyo University of Agriculture**

**6 Research Institute of Green Science and Technology, Shizuoka University**

**7 Department of Bioscience, Tokyo University of Agriculture**

**8 Universal Biology Institute, The University of Tokyo**

**\* Correspondence to: [koseki\\_kobayashi@cell.c.u-tokyo.ac.jp](mailto:koseki_kobayashi@cell.c.u-tokyo.ac.jp) or [cwaka@mail.ecc.u-tokyo.ac.jp](mailto:cwaka@mail.ecc.u-tokyo.ac.jp)**

**Lead contact: Y.W. ([cwaka@mail.ecc.u-tokyo.ac.jp](mailto:cwaka@mail.ecc.u-tokyo.ac.jp))**

### Abstract

Raman spectroscopy is an imaging technique that can reflect whole-cell molecular compositions *in vivo*, and has been applied recently in cell biology to characterize different cell types and states. However, due to the complex molecular compositions and spectral overlaps, the interpretation of cellular Raman spectra have remained unclear.

In this report, we compared cellular Raman spectra to transcriptomes of *Schizosaccharomyces pombe* and *Escherichia coli*, and provide firm evidence that they can be computationally connected and interpreted. Specifically, we find that the dimensions of high-dimensional Raman spectra and transcriptomes measured by RNA-seq can be effectively reduced and connected linearly through a shared low-dimensional subspace. Accordingly, we were able to reconstruct global gene expression profiles by applying the calculated transformation matrix to Raman spectra, and vice versa. Strikingly, highly expressed ncRNAs contributed to the Raman-transcriptome linear correspondence more significantly than mRNAs in *S. pombe*, which implies their major role in coordinating molecular compositions. This compatibility between whole-cell Raman spectra and transcriptomes marks an important and promising step towards establishing spectroscopic live-cell omics studies.

## Introduction

Raman spectroscopy is a laser-based analytical technique that measures the energy shift of scattered photons caused by molecular bond vibrations. Specific molecules have unique Raman spectral signatures, which in turn allows us to determine the chemical species in target samples. This technique is applicable to biological samples, and can potentially unravel the abundances of various biomolecules in cells and tissues in a comprehensive, non-destructive, and label-free manner.

Typically, interpreting spectra involves decomposing them into those of known purified spectra and quantifying the corresponding molecules. Numerous methods such as multivariate curve resolution alternating least squares (MCR-ALS) have been developed [1,2]. However, preparing spectra of each and every biomolecule of cells is laborious, or even impossible. In addition, none of these methods resolve severe spectral overlaps of biomolecules, which makes unique quantification intractable. Consequently, it is widely recognized that discerning constituent molecular species in a comprehensive manner is difficult, making the interpretation of whole-cell Raman spectra nearly intractable [3–6].

Alternative approaches of interpretation are to represent intrinsically high-dimensional cellular Raman spectra in low-dimensional spaces using dimension

reduction methods such as principal component analysis (PCA) and linear discriminant analysis (LDA) [1, 7, 8]. Though these methods can sometimes successfully assign the spectra from different cell types or states to distinct subspaces, the interpretation still remains unclear because the resulting axes and spaces usually cannot be characterized by any biological properties. These approaches therefore often fail to provide any mechanistic insights into the differences of the spectra.

In this report, instead of pursuing the spectral decomposition, we asked whether whole-cell Raman spectra could be directly and computationally corresponded to other types of well studied omics-level information. Employing dimension reduction methods, we reveal a surprising correspondence between cellular Raman spectra and transcriptomes for *S. pombe* and *E. coli*. We show that a simple linear transformation links these two types of high-dimensional data, and demonstrate that global expression profiles of transcriptomes across culture conditions can be reconstructed in non-destructive manners from cellular Raman spectra, which was made possible by the intrinsic low-dimensionality of transcriptomes. Furthermore, interestingly in *S. pombe*, ncRNAs contributed to the Raman-transcriptome linearity more significantly than mRNAs, supporting their major role in coordinating total molecular compositions in eukaryotic cells. Together, these results show that whole-cell Raman spectra can be directly and computationally linked to cellular omics information, and paves a new way to conducting spectroscopic live-cell omics studies in the future.

## Results

### PC-LDA can reveal distinct cellular states of *S. pombe* from Raman spectra

We obtained Raman spectra of single *S. pombe* cells sampled from 10 different culture conditions using a custom-built Raman microscope with 532 nm excitation wavelength, 10 s exposure time and 4 mW power at the sample stage (Fig. S1). Technical details on signal filtering and noise reduction are explained in Materials and Methods. Culture conditions are listed in Table S1, which includes rich and minimal media, nutrient depleted media, and various stress conditions. Prior to measurements of Raman spectra,

cells were fixed with 2% formaldehyde at 4°C. We obtained Raman spectra from 54-76  
cells per condition.

Raman spectra from cells had common features: the strong signal peaks of CH<sub>2</sub> and  
CH<sub>3</sub> bonds around 2800 to 3000 cm<sup>-1</sup>; the silent region from 1800 cm<sup>-1</sup> to 2800 cm<sup>-1</sup>;  
and the rugged peaks from 700 cm<sup>-1</sup> to 1800 cm<sup>-1</sup> (Fig. 1A, 1B, and S2). These global  
features are common among various cell types including mammalian cells [3,9–11], thus  
reflecting the basic chemical composition of cells. The spectral range from 700 cm<sup>-1</sup> to  
1800 cm<sup>-1</sup>, the *fingerprint region of biological samples* [9,10], is where most of the  
signals such as proteins and metabolites are observed. We therefore focused on this  
spectral region in the following analyses.

We first asked whether these spectra can be classified based on the culture condition  
from which the cells were sampled, and conducted the principal component-linear  
discriminant analysis (PC-LDA) [7,8,12]. A Raman spectrum from a cell can be  
represented as a single point in a high-dimensional space (599 dimensions in our  
measurements) where the signal intensity at a specific Raman-shift wavenumber  
position corresponds to one dimension (Fig. 1C). Taking the culture-condition  
assignments into account and simultaneously avoiding over-fitting, PC-LDA  
computationally extracts the most discriminatory bases by maximizing the ratio of the  
between-group variances to the sum of within-group variances in the lower dimensional  
representation (Fig. 1C, and see Materials and Methods). PC-LDA reduces the  
dimensions to the number of groups (environments)–1; we therefore reduced the  
dimensions of Raman spectra to 9 in our analysis.

Our results show that Raman spectra from the same condition form clusters in the  
dimension-reduced Raman space (Fig. 1D-G). Some of the clusters could be recognized  
by the first few LDA axes. Most prominently, spectra from the nitrogen-depleted  
condition (EMM-N) formed a distinctive cluster along the first LDA axis (Fig. 1D).  
Clusters of ethanol stress (EtOH 10%), carbon-source-depleted condition (EMM-C),  
glucose-limited condition (EMM 0.1% Glc.), heat-shock stress (Heat 39°C) and  
glucose-supplemented minimal medium (EMM 2% Glc.) were also well recognized by  
the LDA2-5 axes (Fig. 1E-G). Clusters from other conditions such as osmotic stress  
(Sorbitol 1 M), oxidative stress (H<sub>2</sub>O<sub>2</sub> 2 mM), rich medium (YE) and heavy metal  
stress (CdSO<sub>4</sub> 1 mM) mostly overlapped, so could not be recognized as separate clusters

(Fig. 1G).

PC-LDA reports that the classification error is approximately 9.4%, i.e. test Raman spectra excluded from the calculation of the discriminatory bases are assigned to the correct cluster with 90.6% accuracy. Thus, clusters in the low-dimensional space reflect the characteristic differences of Raman spectra across conditions.

## Testing the linearity between Raman spectra and transcriptomes of *S. pombe*

We next asked whether the classification of Raman spectra in the low-dimensional space can be explained by other biological data. For this purpose, we obtained the transcriptomes of *S. pombe* cells under the same 10 culture conditions. All the transcripts including messenger RNAs (mRNA) and non-coding RNAs (ncRNA) except for ribosomal RNAs (rRNA) were annotated from PomBase [13,14] (see Materials and Methods for details). Our hypothesis was that the transcriptome codes molecular compositions of the cell, and it linearly determines a low-dimensional Raman data  $\mathbf{r}'_{\mathcal{E}}$  obtained from cells in environment  $\mathcal{E}$ . In other words,

$$\mathbf{r}'_{\mathcal{E}} = \mathbf{A}\mathbf{t}_{\mathcal{E}}, \quad (1)$$

where  $\mathbf{A}$  is a linear transformation matrix and  $\mathbf{t}_{\mathcal{E}}$  is a 6560-dimension vector, in which each entry represents the expression level of a transcript in environment  $\mathcal{E}$ .  $\mathbf{t}_{\mathcal{E}}$  are obtained from cell populations, not from single cells. Thus, we calculated the mean of single-cell Raman spectra from each environment  $\mathcal{E}$  to check the correspondence. To test the validity of this linear relation, we conducted a leave-one-out cross-validation (Fig. 2A). Out of all environmental conditions (10 conditions for *S. pombe*), we excluded one condition, and used the remaining 9 to estimate matrix  $\mathbf{A}$  in Eq.(1). Matrix  $\mathbf{A}$  was estimated by the partial least squares regression (PLS-R), which uniquely determines  $\mathbf{A}$  from given datasets of  $\mathbf{r}'_{\mathcal{E}}$  and  $\mathbf{t}_{\mathcal{E}}$  (see Materials and Methods) [15–17]. If our hypothesis is correct, one can predict the Raman spectrum of the excluded condition from the transcriptome data of its corresponding environment by Eq.(1) (Fig. 2A); the predicted Raman vector should be mapped onto the cluster of real spectra of the same environment. Changing the environmental condition to exclude, we repeated the same

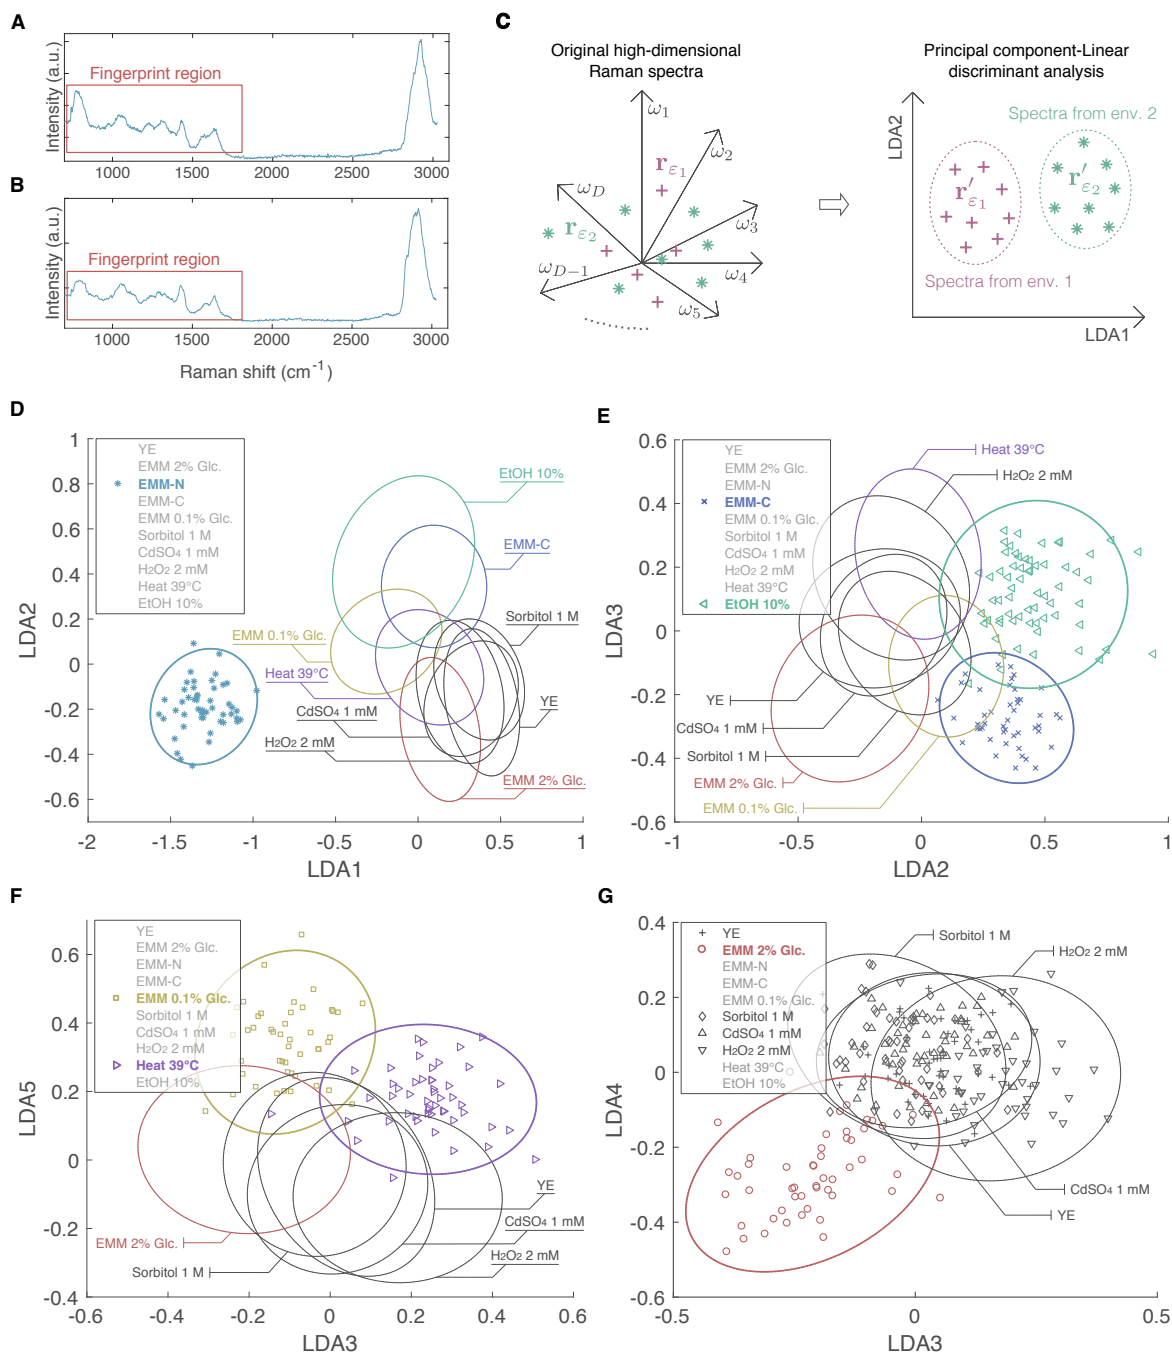

**Figure 1. Measurement and dimension reduction of single-cell Raman spectra of *S. pombe*.** **A, B.** Raman spectra of single cells cultured in rich medium (YE, plot A) and nitrogen-depleted medium (EMM-N, plot B). The fingerprint region of the spectra from 700 cm<sup>-1</sup> to 1800 cm<sup>-1</sup> is indicated by red rectangles. **C.** Dimension reduction of Raman spectra. Raman spectrum from a single cell in environment  $\mathcal{E}$  can be expressed as a single point  $\mathbf{r}_{\mathcal{E}}$  in a high-dimensional space whose axes  $\omega_i$  represent the signal intensity at specific Raman shift positions. Principal component-linear discriminant analysis (PC-LDA) is applied to Raman spectra to remove systematic-error while simultaneously reducing the dimensionality. If environmentally-dependent spectral features exist, PC-LDA can assign spectra from different environments to unique different clusters in low-dimensional LDA spaces. **D-G.** Single-cell Raman spectra processed by PC-LDA and expressed in low-dimensional space (ellipses, the  $\chi^2$  95% confidence intervals of the mean of each condition). Notably, the first few LDA axes were able to distinguish spectra from cells cultured in nitrogen-depleted medium (EMM-N), ethanol stress (EtOH 10%), glucose depleted (EMM-C), glucose limited (EMM 0.1% Glc.), heat shock (Heat 39°C) and glucose-supplemented minimal medium (EMM 2% Glc.).

process of estimating matrix  $\mathbf{A}$  and predicting the Raman spectrum of the excluded condition for all environmental conditions.

Our results show that predicted spectra were indeed assigned to positions within or adjacent to corresponding clusters (Fig. 2B and S3), supporting our hypothesis of linear correspondence.

To further test the reality of the observed linear correspondence, we calculated the predicted residual error sum of squares (PRESS) and compared it with randomized data. When estimating  $\hat{\mathbf{A}}$  by PLS-R and using it to predict the Raman spectrum of the excluded condition, we calculated the prediction error defined as  $\|\mathbf{r}'_{\mathcal{E}_i} - \hat{\mathbf{r}}'_{\mathcal{E}_i}\|$ , where  $\mathbf{r}'_{\mathcal{E}_i}$  is the true data and  $\hat{\mathbf{r}}'_{\mathcal{E}_i}$  is the estimated data for environment  $\mathcal{E}_i$ . We repeated the error calculation for all environments, and obtained the sum of squared errors

$$\text{PRESS}_{\mathbf{r}} = \sum_{i=1}^N \|\mathbf{r}'_{\mathcal{E}_i} - \hat{\mathbf{r}}'_{\mathcal{E}_i}\|^2, \quad (2)$$

where  $N$  is the number of environmental conditions. In our case for *S. pombe*,  $N = 10$  and  $\text{PRESS}_{\mathbf{r}} = 5.45$ .

When our hypothesis of linear correspondence is reasonable,  $\text{PRESS}_{\mathbf{r}}$  should be small. To check this, we conducted the permutation test [18–20] by creating 10,000 false datasets in which environmental assignments of transcriptome data were randomly permuted (Fig. 2C). We calculated  $\text{PRESS}_{\mathbf{r}}$  for these false data sets, and compared them to the original experimental value. We found that the original experimental  $\text{PRESS}_{\mathbf{r}}$  was extremely small: the  $p$ -value of obtaining  $\text{PRESS}_{\mathbf{r}}$  smaller than 5.45 was 0.0006 (Fig. 2D). This result offers strong support for the linear correspondence between Raman spectra and transcriptomes, and shows that the classification in the Raman space can be explained by differences of transcriptomes across conditions.

To further gain insight into the observed correspondence, we asked how many environments are necessary to find a good linear correspondence. To this end, we purposely selected fewer numbers of environments (5-9 environments), and calculated  $\text{PRESS}_{\mathbf{r}}$   $p$ -values for every combination of environments (Fig. 2E). For example, 252 possible combinations exist for 5 environments chosen among 10 ( ${}_{10}C_5$ ) and 210 combinations for 6 environments chosen among 10 ( ${}_{10}C_6$ ).

The result shows that  $p$ -values are generally smaller with more environments, and

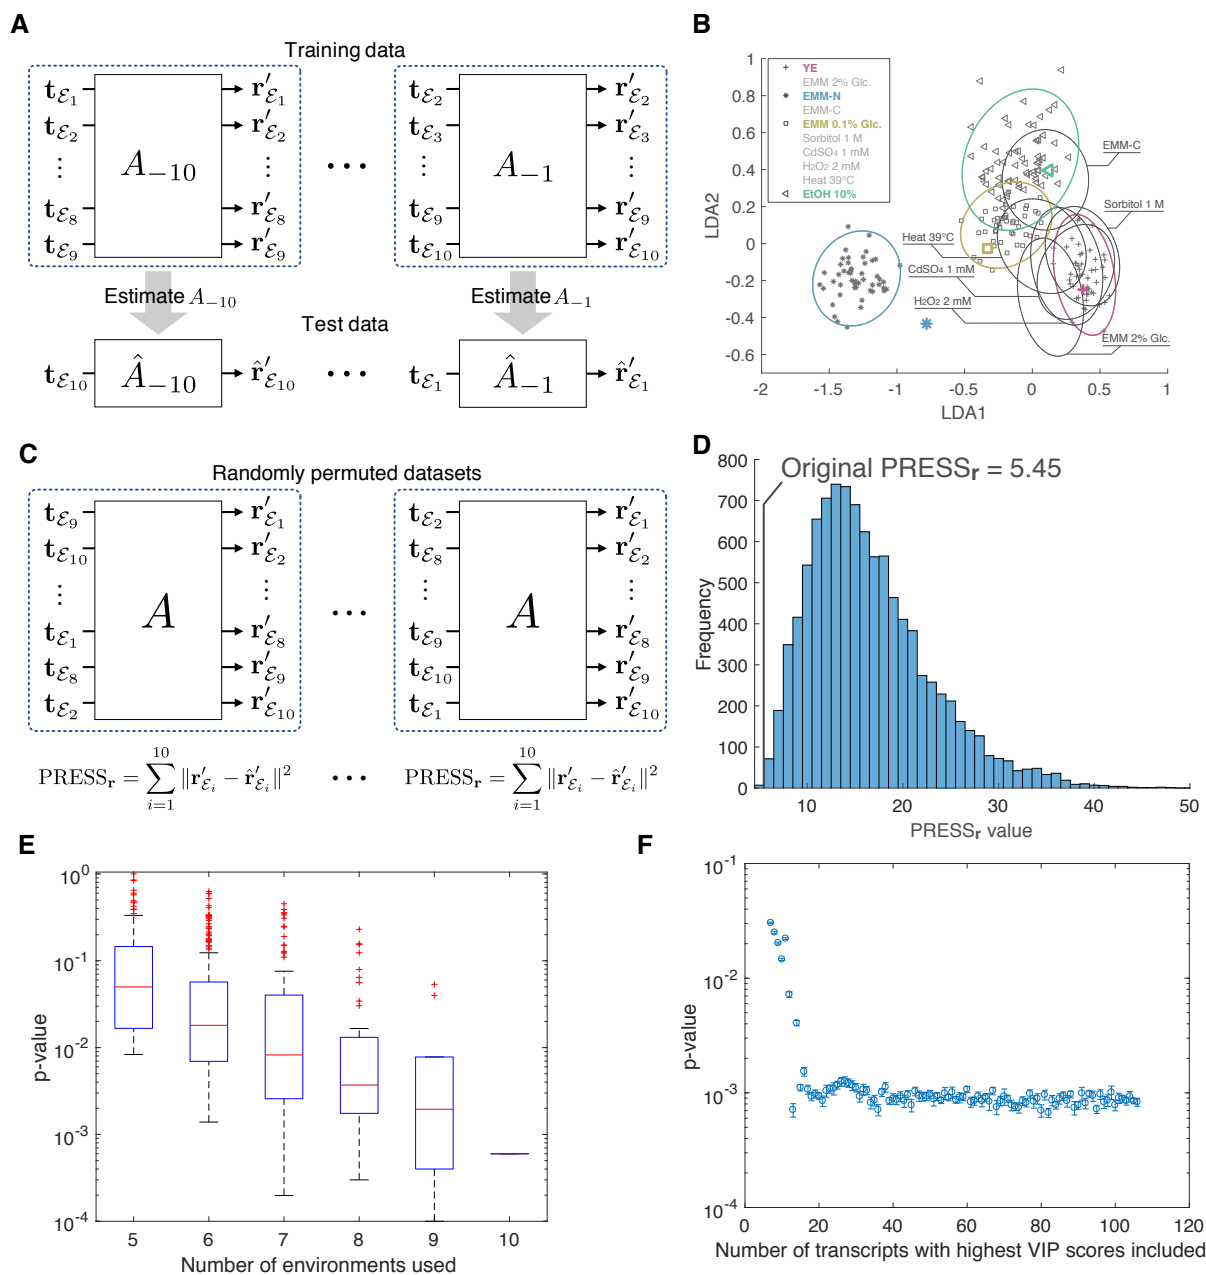

**Figure 2. Linear correspondence between Raman spectra and transcriptomes.** **A.** Leave-one-out cross-validation. Out of all environmental conditions ( $N = 10$  for *S. pombe*), one condition ( $\mathcal{E}_i$ ) is excluded, and the linear regression matrix  $\mathbf{A}_{-i}$  is estimated by the partial least squares regression. Then, the excluded Raman spectrum is estimated by  $\hat{r}'_{\mathcal{E}_i} = \hat{\mathbf{A}}_{-i} t_{\mathcal{E}_i}$ . This is repeated for all  $i = 1, \dots, N$ . **B.** Example predictions of Raman spectra from the transcriptomes. Thick colored points represent Raman spectra predicted from the transcriptomes. **C.** Permutation test for significance of Raman-transcriptome linearity. 10,000 false datasets were created where environmental assignments of transcriptome data were randomly permuted. For each random permutation,  $\text{PRESS}_r$  was calculated and compared with the original  $\text{PRESS}_r$ . **D.** Histogram of  $\text{PRESS}_r$  of 10,000 randomly permuted data. The original  $\text{PRESS}_r$  was 5.45, and the  $p$ -value was 0.0006. **E.**  $\text{PRESS}_r$   $p$ -values when fewer numbers of environments were used.  $\text{PRESS}_r$   $p$ -values were calculated for all possible combinations of environments for each number of environments (5-9 environments), and distributions of  $p$ -values were shown as box-and-whisker plots. **F.**  $p$ -values of  $\text{PRESS}_r$  when increasing the number of transcripts with highest VIP scores.  $p$ -values become stable after including 17 transcripts. The permutation test (10,000 permutations) was repeated 10 times per each point (error bar, standard error).



they all become smaller than 1% with 9 environments except for two combinations (Fig. 2E). These exceptional combinations lacked either EMM-N or EtOH 10%, a special environment distinguishable by axis LDA1 or LDA2 (Fig. 1D and 1E). These results show that having more environmental conditions and conditions in which cellular Raman spectra are largely distant from others, will generally improve the linear correspondence.

We next asked how many different kinds of transcripts are required to find a linear correspondence. To address this, we first evaluated the importance of each transcript based on the variable importance in projection (VIP) score in PLS-R analysis, which reflects the accumulated importance of each transcript to the linear regression [21, 22]. A high VIP score of a transcript indicates that its contribution to the linear correspondence is significant. The top 30 transcripts with the highest VIP scores are listed in Table 1. Then, starting from 7 transcripts (the minimum number of transcripts required to conduct PLS-R, see Materials and Methods for details) with the highest VIP scores, we increased the numbers of transcripts included and conducted the permutation test each time. Both  $p$ -values and  $PRESS_r$  values initially decreased, and plateaued after including 17 transcripts (Fig. 2F and S4). Thus, based on the VIP score, knowing the expression profiles of these 17 transcripts is sufficient to find a linear correspondence.

## Global expression profiles of *S. pombe* transcriptomes across conditions are predictable from Raman spectra

PLS-R not only estimates the linear transformation matrix  $\mathbf{A}$ , but also conducts a dimension reduction of the transcriptome data. We found that only 4 dimensions were required to explain 95% of the total variances of transcriptomes across conditions (Fig. 3A). The low-dimensionality of the transcriptome data indicates that global expression profiles of transcriptomes might also be predictable from Raman spectra. Note that this is a non-trivial inverse problem because we need to predict expression levels of 6560 transcripts in each environment only from 9-dimensional Raman data computed by PC-LDA.

We estimated the global expression profile of transcriptome in environment  $\mathcal{E}_i$  (denoted as  $\hat{\mathbf{t}}_{\mathcal{E}_i}$ ) from obtained Raman spectra  $\mathbf{r}'_{\mathcal{E}_i}$  based on the linear relation of Eq.(1) and the Moore-Penrose pseudo-inverse of the PLS-R parameter  $\hat{\mathbf{A}}_{-i}$  (Fig. 3B; see

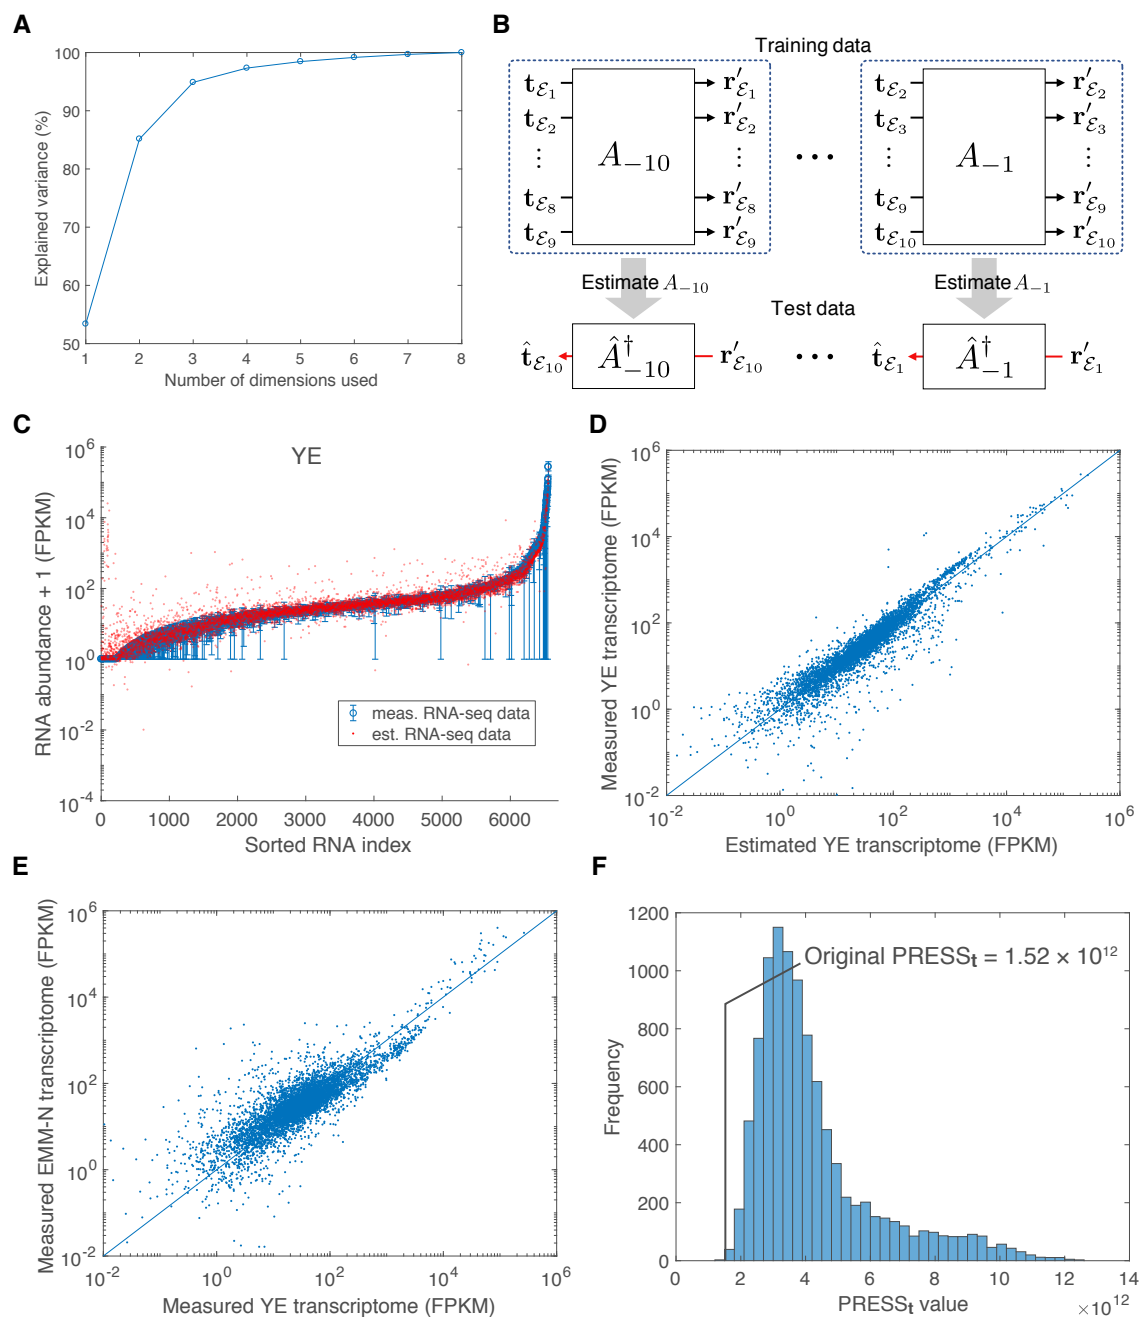

**Figure 3. Predicting transcriptomes from Raman spectra.** **A.** The total variance of transcriptome data explained by PLS-R. The horizontal axis represents the numbers of dimensions of transcriptomes after the dimension reduction by PLS-R used to calculate the variance, and the vertical axis the total variances explained. **B.** Predicting transcriptomes from Raman spectra. Transcriptomes were predicted by calculating the pseudo-inverse of  $\hat{A}_{-i}$  estimated in PLS-R as  $\hat{t}_{\varepsilon_i} = \hat{A}_{-i}^\dagger r'_{\varepsilon_i}$ . This is repeated for all  $i = 1, \dots, N$ . **C.** An example prediction of the transcriptome of rich medium environment (YE). Blue points represent the measured RNA abundance + 1 (FPKM) (average of the two replicate measurements; error bar, max-min range) sorted from low to high along the horizontal axis. Red points represent the RNA abundance predicted from Raman spectra. **D.** Scatter plot of the predicted YE medium transcriptome versus the measured YE medium transcriptome. **E.** Scatter plot of the measured YE medium transcriptome versus the measured nitrogen-depleted medium (EMM-N) transcriptome. **F.** Histogram of PRESS<sub>t</sub> of 10,000 randomly permuted data. Environmental assignments of transcriptomes were randomly permuted 10,000 times, and PRESS<sub>t</sub> were calculated for each permutation. The probability of accidentally finding PRESS<sub>t</sub> less than the original experimental value,  $1.52 \times 10^{12}$ , was extremely low ( $p$ -value 0.0004).

**Table 1. List of *S. pombe* transcripts with top 30 VIP scores.** The VIP score of each transcript is shown on the third column. The mean expression level of each transcript across 10 environmental conditions is shown on the fourth column, in the unit of fragments per kilobase per million mapped reads (FPKM). Type “N” on the fifth column indicates that the transcripts are known or predicted non-coding RNAs.

| ID              | Name            | VIP  | FPKM               | Type | Description                               |
|-----------------|-----------------|------|--------------------|------|-------------------------------------------|
| SPSNRNA.06      | snu6            | 52.3 | $3.95 \times 10^5$ | N    | small nuclear RNA U6                      |
| SPNCRNA.98      | srp7            | 26.6 | $3.86 \times 10^5$ | N    | 7SL signal recognition particle component |
| SPMITTRNALYS.01 | SPMITTRNALYS.01 | 23.1 | $1.81 \times 10^5$ | N    | tRNA Lysine, mitochondrial                |
| SPNCRNA.510     | SPNCRNA.510     | 21.1 | $1.46 \times 10^5$ | N    | non-coding RNA (predicted)                |
| SPSNORNA.24     | snoR39b         | 18.8 | $1.32 \times 10^5$ | N    | small nucleolar RNA R39b (predicted)      |
| SPSNORNA.31     | snoR39a         | 12.1 | $7.27 \times 10^4$ | N    | small nucleolar RNA snR39                 |
| SPSNORNA.43     | snR91           | 11.2 | $1.29 \times 10^5$ | N    | box H/ACA small nucleolar RNA snR91       |
| SPSNORNA.17     | snoR58          | 11.2 | $7.54 \times 10^4$ | N    | small nucleolar RNA snR58 (predicted)     |
| SPMITTRNAGLY.01 | SPMITTRNAGLY.01 | 10.5 | $6.44 \times 10^4$ | N    | tRNA Glycine, mitochondrial               |
| SPSNORNA.32     | sno12           | 10.4 | $1.29 \times 10^5$ | N    | box H/ACA small nucleolar RNA 12/snR99    |
| SPSNORNA.13     | snoR69b         | 9.87 | $9.17 \times 10^4$ | N    | small nucleolar RNA snoR69b (predicted)   |
| SPSNORNA.27     | snoR47          | 9.25 | $5.38 \times 10^4$ | N    | small nucleolar RNA R47 (predicted)       |
| SPMITTRNAALA.01 | SPMITTRNAALA.01 | 8.25 | $2.88 \times 10^4$ | N    | tRNA Alanine, mitochondrial               |
| SPSNORNA.16     | snoR56          | 8.03 | $6.96 \times 10^4$ | N    | small nucleolar RNA snR56 (predicted)     |
| SPNCRNA.507     | SPNCRNA.507     | 7.88 | $7.79 \times 10^4$ | N    | non-coding RNA (predicted)                |
| SPSNORNA.01     | snR40           | 7.80 | $4.02 \times 10^4$ | N    | small nucleolar RNA snR40 (predicted)     |
| SPATRNAILE.02   | SPATRNAILE.02   | 7.77 | $3.10 \times 10^4$ | N    | tRNA Isoleucine                           |
| SPMITTRNATYR.01 | SPMITTRNATYR.01 | 7.42 | $2.46 \times 10^4$ | N    | tRNA Tyrosine, mitochondrial              |
| SPMITTRNAASP.01 | SPMITTRNAASP.01 | 7.41 | $3.10 \times 10^4$ | N    | tRNA Aspartic acid, mitochondrial         |
| SPSNORNA.21     | snoU14          | 6.97 | $5.77 \times 10^4$ | N    | small nucleolar RNA U14                   |
| SPSNORNA.41     | snR46           | 6.29 | $5.33 \times 10^4$ | N    | box H/ACA small nucleolar RNA snR46       |
| SPBTRNAARG.04   | SPBTRNAARG.04   | 5.98 | $2.61 \times 10^4$ | N    | tRNA Arginine                             |
| SPMITTRNAGLU.01 | SPMITTRNAGLU.01 | 5.52 | $2.39 \times 10^4$ | N    | tRNA Glutamic acid, mitochondrial         |
| SPCTRNAARG.08   | SPCTRNAARG.08   | 5.46 | $2.12 \times 10^4$ | N    | tRNA Arginine                             |
| SPBTRNAGLY.09   | SPBTRNAGLY.09   | 5.43 | $1.53 \times 10^4$ | N    | tRNA Glycine                              |
| SPSNRNA.01      | snu1            | 5.27 | $6.80 \times 10^4$ | N    | small nuclear RNA U1                      |
| SPSNORNA.44     | snR92           | 4.80 | $5.22 \times 10^4$ | N    | box H/ACA small nucleolar RNA snR92       |
| SPSNRNA.07      | snu32           | 4.76 | $5.78 \times 10^4$ | N    | small nucleolar RNA U3B                   |
| SPBTRNATHR.06   | SPBTRNATHR.06   | 4.71 | $1.89 \times 10^4$ | N    | tRNA Threonine                            |
| SPATRNAVAL.01   | SPATRNAVAL.01   | 4.56 | $1.20 \times 10^4$ | N    | tRNA Valine                               |

Materials and Methods for details). The results showed reasonably good agreements  
between  $\hat{\mathbf{t}}_{\mathcal{E}_i}$  and  $\mathbf{t}_{\mathcal{E}_i}$  (Fig. 3C, 3D, and S5). However, we also noticed that  
transcriptome data across conditions were already tightly correlated (Fig. 3E and S7),  
and likewise found relatively good agreements even between  $\hat{\mathbf{t}}_{\mathcal{E}_i}$  and transcriptome data  
of different environments (Fig. S8). We therefore evaluated in detail the precision level  
of our prediction by calculating the PRESS of transcriptomes,

$$\text{PRESS}_{\mathbf{t}} = \sum_{i=1}^N \|\mathbf{t}_{\mathcal{E}_i} - \hat{\mathbf{t}}_{\mathcal{E}_i}\|^2, \quad (3)$$

and again implemented the permutation test by randomly permuting the environmental  
correspondence between Raman and transcriptome data. Again for *S. pombe*,  $N = 10$ .  
Thereby we found that the original  $\text{PRESS}_t$  was very small:  $p = 0.0004$  (Fig. 3F). The  
original prediction is thus significantly superior to randomly permuted data. In fact,  
transcriptomes predicted from Raman spectra explain the condition-dependent fold  
changes of mRNA and non-coding RNA transcripts (Fig. S6). These results prove that  
cellular Raman spectra allow us to capture the real global changes of the expression  
profile of transcriptomes across conditions in good precision. Note that without the  
low-dimensionality of transcriptomes, it is impossible to retrieve genome-wide  
expression profiles from the low-dimensional Raman spectra.

### The Raman-transcriptome correspondence in *E. coli*

To understand whether the observed Raman-transcriptome linearity is specific to *S. pombe* or more generally applicable to other organisms, we measured cellular Raman spectra and transcriptomes of *E. coli*. We focused on an *E. coli* strain MG1655 and its  $\Delta cyaA$  mutant. *cyaA* encodes adenylyl cyclase, which catalyzes the synthesis of cyclic AMP (cAMP) from ATP [23]. The growth of the  $\Delta cyaA$  mutant is suppressed in cAMP-depleted culture media, but restored by exogenous cAMP supplement in a concentration-dependent manner [24]. We measured cellular Raman spectra (Fig. 4A, 4B and S9) and transcriptomes of  $\Delta cyaA$  mutant cultured in the media with 0, 0.1, 0.5 and 1 mM cAMP, and those of the parental MG1655 strain (no cAMP in the medium) all sampled from late-exponential phase ( $\text{OD}_{660} = 0.8$ ).

As was done for *S. pombe*, we first conducted PC-LDA to obtain Raman spectra, finding that spectra under five different conditions (4 for the  $\Delta cyaA$  mutant, and 1 for wild type) can be classified in a low-dimensional Raman space (Fig. 4C). Interestingly, clusters of Raman spectra of the mutant became closer to that of wild type as the concentration of exogenous cAMP increased. Next we conducted PLS-R to find a linear regression, and found that Raman spectra predicted from transcriptome data were assigned within or adjacent to the correct clusters (Fig. 4C). We calculated  $\text{PRESS}_r$  by Eq. (2) where  $N = 5$  for *E. coli*, and subsequently conducted a permutation test. The test showed that the original combination of the Raman and transcriptome data gave

the third lowest  $\text{PRESS}_r$  (1.06) among the  $5! (= 120)$  possible permuted combinations (203  
( $\text{PRESS}_r$   $p$ -value 0.0250, Fig. 4D). The prediction of transcriptomes from Raman (204  
spectra also gave good results, giving the second smallest  $\text{PRESS}_t$  ( $\text{PRESS}_t$   $p$ -value (205  
0.0167, Fig. 4E, 4F, S11, S10-S13). Together, this confirms the linear correspondence (206  
between Raman spectra and transcriptomes even in *E. coli*, and indicates that it should (207  
have broader applicability to other organisms and cell types. (208

## ncRNAs are largely responsible for the Raman-transcriptome (209 correspondence in *S. pombe* (210

We next examined what types of transcripts were responsible for establishing the (211  
observed Raman-transcriptome linear correspondence. Based on the list of transcripts (212  
sorted by the VIP scores, we found out that the main contributors were largely ncRNAs (213  
including small nucleolar RNAs (snoRNAs) and tRNAs in *S. pombe* (Table 1): The (214  
highest scoring mRNA was ranked only at the 55-th from the top. (215

To further understand this result, we separated transcriptomes of *S. pombe* into (216  
mRNAs (containing 5091 transcripts) and ncRNAs (containing 1469 transcripts), and (217  
checked whether a linear correspondence can be found between Raman spectra and (218  
these coding and non-coding subsets of transcriptomes (Fig. 5A). The result showed (219  
that the linear correspondence between Raman spectra and mRNAs was as poor as (220  
randomly permuted data ( $\text{PRESS}_{\text{mRNA}}$   $p$ -value = 0.4803), whereas the correspondence (221  
with the ncRNA subset was excellent ( $\text{PRESS}_{\text{ncRNA}}$   $p$ -value = 0.0009, Fig. 5A). This (222  
also confirms the importance of ncRNAs to find the linear correspondence between (223  
Raman spectra and transcriptomes. (224

We also randomly sampled different numbers of transcripts either from the mRNA (225  
or ncRNA subset, and searched for the presence of a linear correspondence between (226  
those randomly sampled subsets and Raman spectra. Our results show that only very (227  
limited combinations of the sampled mRNA subsets yielded linearity (Fig. 5B), but (228  
many subsets of ncRNAs could correspond even with small numbers of transcripts (Fig. (229  
5C). This result again indicates the superiority of ncRNAs for finding a linear (230  
correspondence. (231

Note that these results do not indicate that Raman spectra cannot predict mRNA (232

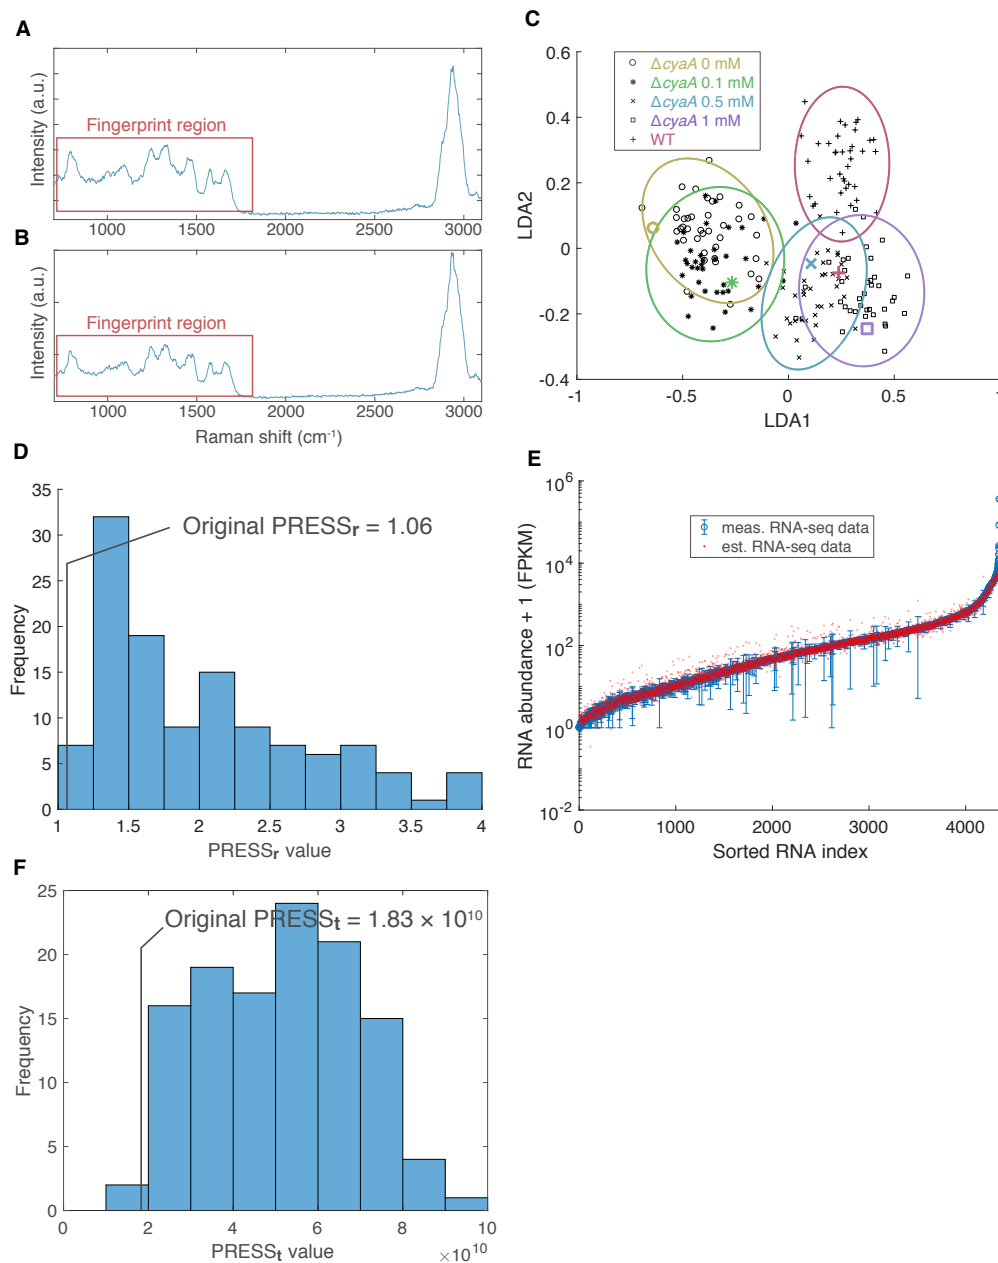

**Figure 4. Raman-transcriptome correspondence in *E. coli*.** **A, B.** Example Raman spectra of *E. coli* for wild type (WT, plot A), and  $\Delta cyaA$  mutant supplemented with 0 mM cAMP ( $\Delta cyaA$  0 mM, plot B). Red rectangles represent the fingerprint region. **C.** Dimension reduction of *E. coli* Raman spectra by PC-LDA. Black points represent the measured Raman spectra after dimension reduction by PC-LDA shown on the LDA1-LDA2 plane. Colored ellipses represent the  $\chi^2$  95% confidence intervals for different culture conditions: Yellow for  $\Delta cyaA$  0 mM; green for  $\Delta cyaA$  0.1 mM; blue for  $\Delta cyaA$  0.5 mM; purple for  $\Delta cyaA$  1 mM; red for WT. Thick colored points denote the low-dimensional Raman data predicted from the corresponding transcriptomes. **D.** PRESS<sub>r</sub> histogram when randomly permuting environmental assignments of transcriptome data. The original experimental PRESS<sub>r</sub> = 1.06 was the third lowest of all  $5! = 120$  possible permutations ( $p$ -value =  $3/120 = 0.0250$ ). **E.** Example prediction of *E. coli*  $\Delta cyaA$  0 mM transcriptomes from Raman spectra by  $\hat{\mathbf{t}}_{\mathcal{E}_i} = \hat{\mathbf{A}}_{-i}^\dagger \mathbf{r}'_{\mathcal{E}_i}$ . Blue points represent the measured RNA abundance + 1 (FPKM) (average of the three replicate measurements; error bar, standard error) sorted from low to high along the horizontal axis. Red points represent the RNA abundance predicted from Raman spectra. **F.** PRESS<sub>t</sub> histogram when randomly permuting environmental assignments of transcriptome data. The original experimental PRESS<sub>t</sub> =  $1.83 \times 10^{10}$  was the second lowest of all  $5! = 120$  possible permutations ( $p$ -value =  $2/120 = 0.0167$ ).

profiles: our prediction of mRNA expression levels from Raman spectra was actually  
more precise than ncRNA expression levels as below. To evaluate the prediction  
accuracy of transcriptomes, we calculated the “coefficient of variation of prediction error  
per each transcript” as follows:

$$\text{CVPRESS}_{\mathbf{t}} = \frac{\sqrt{\text{PRESS}_{\mathbf{t}}}}{\dim \mathbf{t} \cdot \text{mean } \mathbf{t}}, \quad (4)$$

where  $\dim \mathbf{t}$  is the total number of transcripts, and  $\text{mean } \mathbf{t}$  is the mean expression level  
of all transcripts in  $\mathbf{t}$  across all environment conditions. Here, we used  $\mathbf{t}_{\text{mRNA}}$  or  $\mathbf{t}_{\text{ncRNA}}$   
for  $\mathbf{t}$ . We found that  $\text{CVPRESS}_{\mathbf{t}_{\text{mRNA}}} = 0.0909$  and  $\text{CVPRESS}_{\mathbf{t}_{\text{ncRNA}}} = 0.383$ , showing  
that the prediction accuracy of each mRNAs relative to their mean expression levels was  
actually higher than that of ncRNAs. This may be counterintuitive to the fact that  
 $\text{PRESS}_{\mathbf{r}_{\text{mRNA}}}$   $p$ -value is high. Instead, this indicates that expression levels of mRNAs do  
not change much across conditions, and there is not much difference even when the data  
set is randomly permuted. In fact, the coefficient of variations (CV) of expression levels  
across conditions were larger for ncRNAs than for mRNAs (Fig. 5D). Also,  
 $\text{PRESS}_{\mathbf{r}_{\text{ncRNA}}}$  of randomized data changed over a much broader range than mRNAs  
(Fig. 5A), showing once again that expression levels of ncRNAs change more  
dynamically in response to environmental changes.

We likewise conducted the same analysis for *E. coli*. In *E. coli*, the number of  
ncRNAs is much smaller than that of *S. pombe*, constituting only 2.18% of the *E. coli*  
transcriptome. The analysis revealed that the linear correspondence can be found with  
both mRNA and ncRNA subsets ( $p$ -value = 0.0250 for mRNA, and 0.0167 for ncRNA,  
Fig. 5E). In fact, 28 among the 30 top VIP-scored transcripts were mRNAs (Table 2).  
Random sampling test also showed that the linear correspondence was more easily  
found with mRNA subsets than with ncRNA subsets for the current 5 conditions (Fig.  
S14). Therefore, the necessity of ncRNAs for the Raman-transcriptome linearity was  
not as apparent as that in *S. pombe*.



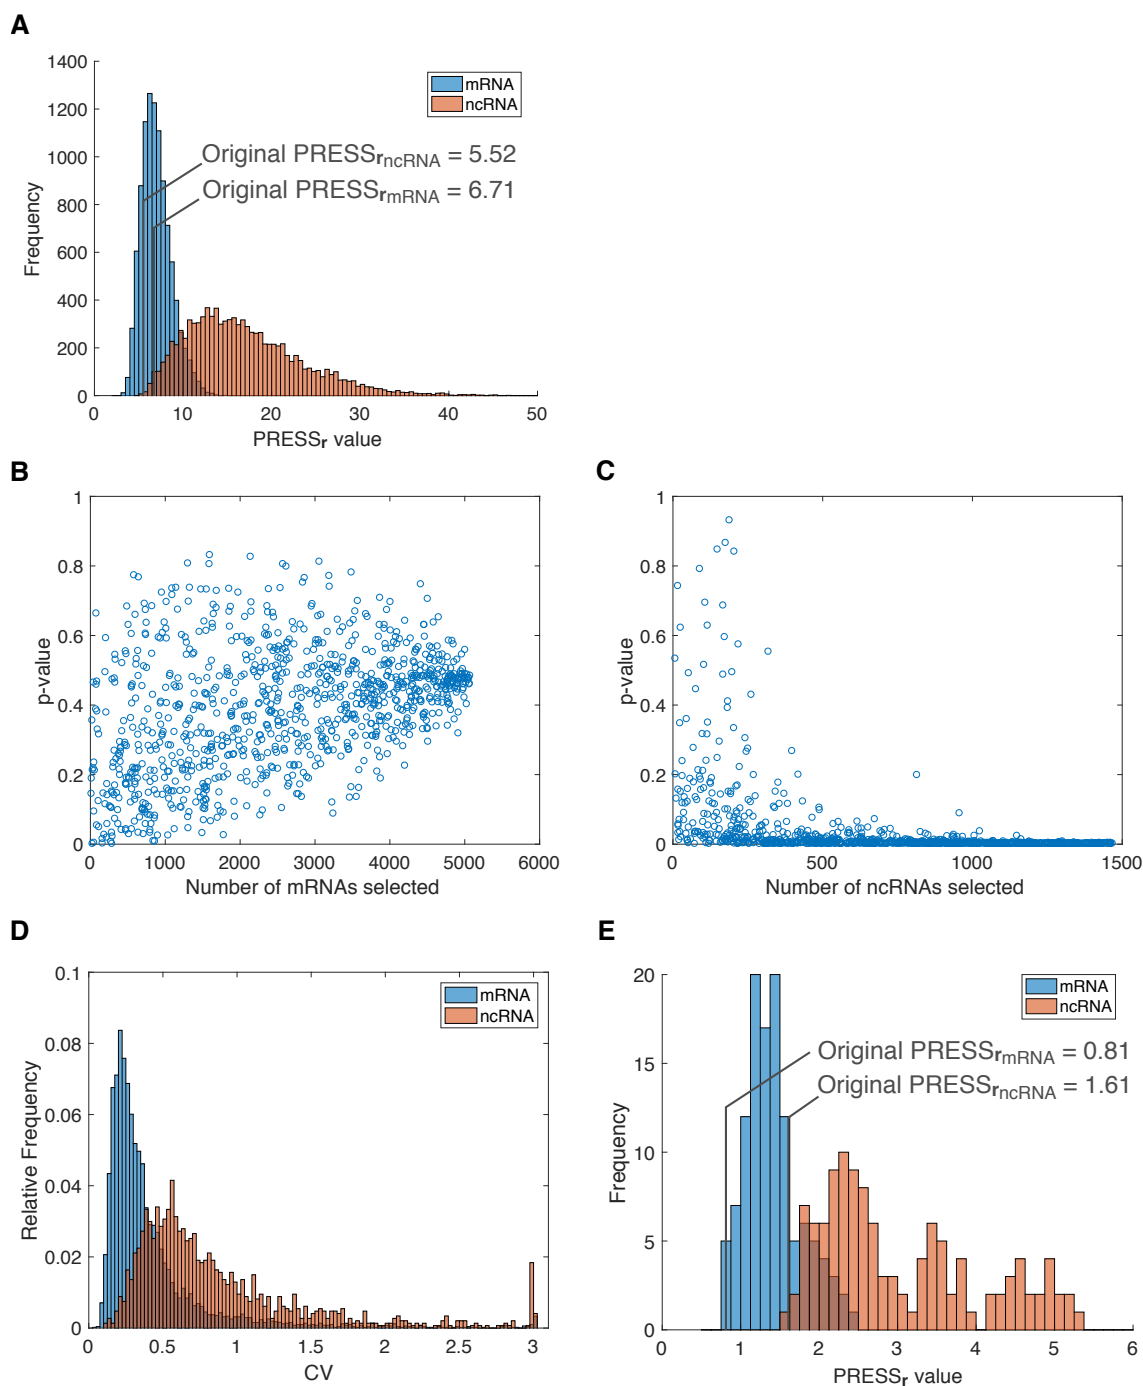

**Figure 5. Transcriptome subsets contributing to the Raman-transcriptome correspondence.** **A.**  $PRESS_r$  histograms of randomly permuted data sets of *S. pombe* mRNAs (blue) and ncRNAs (red). Original  $PRESS_r$  of mRNA was 6.71 ( $p$ -value, 0.4803) and that of ncRNAs was 5.52 ( $p$ -value, 0.0009). **B.**  $PRESS_r$   $p$ -values of randomly selected mRNA subsets in *S. pombe*. 1,000 subsets were selected, and 1,000 random permutations per each subset were conducted to calculate  $p$ -values. **C.**  $PRESS_r$   $p$ -values of randomly selected ncRNA subsets in *S. pombe*. 1,000 subsets were selected, and 1,000 random permutations per each subset were conducted to calculate  $p$ -values. In stark contrast to mRNAs, the vast majority of ncRNA subsets had small  $p$ -values. **D.** Histograms of coefficient of variations of mRNAs (blue) and ncRNAs (red) across 10 environmental conditions in *S. pombe*. **E.**  $PRESS_r$  histograms of randomly permuted data sets of *E. coli* mRNAs (blue) and ncRNAs (red). Original  $PRESS_r$  of mRNA was 0.81 ( $p$ -value, 0.0250) and that of ncRNAs was 1.61 ( $p$ -value, 0.0167).



**Table 2. List of *E. coli* transcripts with top 30 VIP scores.** The VIP score of each transcript is shown on the third column. The mean expression level of each transcript across 5 environmental conditions is shown on the fourth column, in the unit of FPKM. Type “N” and “C” on the fifth column indicate ncRNAs and mRNAs, respectively.

| ID    | Name | VIP  | FPKM               | Type | Description                                                                                                                                                                             |
|-------|------|------|--------------------|------|-----------------------------------------------------------------------------------------------------------------------------------------------------------------------------------------|
| b2621 | ssrA | 54.3 | $2.57 \times 10^5$ | N    | tmRNA, 10Sa RNA                                                                                                                                                                         |
| b3123 | rnpB | 21.9 | $8.98 \times 10^4$ | N    | RNase P, M1 RNA component                                                                                                                                                               |
| b1677 | lpp  | 14.2 | $2.94 \times 10^4$ | C    | murein lipoprotein                                                                                                                                                                      |
| b2579 | grcA | 13.5 | $9.88 \times 10^3$ | C    | autonomous glycyl radical cofactor                                                                                                                                                      |
| b3510 | hdeA | 8.98 | $1.73 \times 10^4$ | C    | stress response protein acid-resistance protein                                                                                                                                         |
| b3708 | tnaA | 5.98 | $2.90 \times 10^3$ | C    | tryptophanase/L-cysteine desulfhydrase, PLP-dependent                                                                                                                                   |
| b2266 | elaB | 5.64 | $7.85 \times 10^3$ | C    | putative membrane-anchored DUF883 family ribosome-binding protein                                                                                                                       |
| b3556 | cspA | 4.28 | $1.04 \times 10^4$ | C    | RNA chaperone and antiterminator, cold-inducible                                                                                                                                        |
| b3985 | rplJ | 3.32 | $9.30 \times 10^3$ | C    | 50S ribosomal subunit protein L10                                                                                                                                                       |
| b4217 | ytfK | 3.05 | $4.27 \times 10^3$ | C    | DUF1107 family protein                                                                                                                                                                  |
| b2215 | ompC | 2.93 | $1.48 \times 10^4$ | C    | outer membrane porin protein C                                                                                                                                                          |
| b3986 | rplL | 2.90 | $8.53 \times 10^3$ | C    | 50S ribosomal subunit protein L7/L12                                                                                                                                                    |
| b0953 | rmf  | 2.88 | $3.24 \times 10^3$ | C    | ribosome modulation factor                                                                                                                                                              |
| b0812 | dps  | 2.85 | $4.45 \times 10^3$ | C    | Fe-binding and storage protein; stress-inducible DNA-binding protein                                                                                                                    |
| b3314 | rpsC | 2.66 | $5.94 \times 10^3$ | C    | 30S ribosomal subunit protein S3                                                                                                                                                        |
| b2096 | gatY | 2.65 | $2.01 \times 10^3$ | C    | D-tagatose 1,6-bisphosphate aldolase 2, catalytic subunit                                                                                                                               |
| b0957 | ompA | 2.65 | $1.35 \times 10^4$ | C    | outer membrane protein A (3a;II*;G;d)                                                                                                                                                   |
| b3316 | rpsS | 2.64 | $5.82 \times 10^3$ | C    | 30S ribosomal subunit protein S19                                                                                                                                                       |
| b2343 | yfcZ | 2.60 | $3.88 \times 10^3$ | C    | UPF0381 family protein                                                                                                                                                                  |
| b3296 | rpsD | 2.57 | $7.45 \times 10^3$ | C    | 30S ribosomal subunit protein S4                                                                                                                                                        |
| b3315 | rplV | 2.51 | $5.68 \times 10^3$ | C    | 50S ribosomal subunit protein L22                                                                                                                                                       |
| b3509 | hdeB | 2.50 | $5.08 \times 10^3$ | C    | acid-resistance protein                                                                                                                                                                 |
| b4240 | treB | 2.48 | $1.32 \times 10^3$ | C    | trehalose-specific PTS enzyme: IIB and IIC component                                                                                                                                    |
| b3307 | rpsN | 2.47 | $6.91 \times 10^3$ | C    | 30S ribosomal subunit protein S14                                                                                                                                                       |
| b2092 | gatC | 2.46 | $1.65 \times 10^3$ | C    | pseudogene, galactitol-specific enzyme IIC component of PTS; transport; Transport of small molecules: Carbohydrates, organic acids, alcohols; PTS system galactitol-specific enzyme IIC |
| b0814 | ompX | 2.44 | $5.12 \times 10^3$ | C    | outer membrane protein X                                                                                                                                                                |
| b3308 | rplE | 2.42 | $7.31 \times 10^3$ | C    | 50S ribosomal subunit protein L5                                                                                                                                                        |
| b3065 | rpsU | 2.40 | $7.17 \times 10^3$ | C    | 30S ribosomal subunit protein S21                                                                                                                                                       |
| b3319 | rplD | 2.39 | $6.02 \times 10^3$ | C    | 50S ribosomal subunit protein L4                                                                                                                                                        |
| b4015 | aceA | 2.38 | $3.12 \times 10^3$ | C    | isocitrate lyase                                                                                                                                                                        |

## Discussion

Cellular Raman spectra reflect the comprehensive molecular compositions of cells, and therefore spectral differences should be associated with cellular state differences.

However, interpreting spectra has been challenging due to the difficulty of decomposing total cellular spectra into those of constituent biomolecules. In this report, instead of pursuing the spectral decomposition, we asked whether whole-cell Raman spectra could be directly and computationally corresponded to other types of well studied omics-level

information. Employing dimension reduction methods, we showed that dimensions of  
high dimensional cellular Raman spectra and transcriptomes measured by RNA-seq can  
be greatly reduced, and connected linearly through a shared low-dimensional subspace.  
Accordingly, we were able to reconstruct global gene expression profiles by applying the  
calculated transformation matrix to cellular Raman spectra, and vice versa. We  
therefore provided firm experimental evidence that the differences of cellular Raman  
spectra contain key information that allows us to detect cellular states.

The linear correspondence between cellular Raman spectra and transcriptomes is far  
from trivial because transcriptomes targeted in our study (the total RNA excluding  
rRNAs) constitute only a small fraction of biomass: the total RNA excluding rRNAs  
constitute 2% of the biomass, whereas proteins constitute 40-50% in *Saccharomyces  
cerevisiae* [25,26]. Furthermore, Raman signals mostly come from proteins, and the  
contribution of total RNAs to the total signal is considered minor [27,28]. It is thus  
implausible that the observed Raman spectra directly reflects signals from RNAs  
targeted in our study. The observed linear correspondence instead indicates that  
whole-cell molecular compositions of cells are tightly and linearly constrained by the  
transcriptome. Cellular Raman signals come from all the constituent biomolecules in a  
cell including proteins, lipids, and metabolites, but our PLS-R analysis did not take into  
account of the abundances of biomolecules other than a fraction of RNAs. The fact that  
Raman spectra and transcriptomes correspond linearly implies that abundances of other  
biomolecules might also be linearly related to the transcriptome. This speculation could  
be tested by trans-omics analyses to examine the correspondences among multi-level  
omics data such as proteomes, metabolomes, and transcriptomes [29]. The unexpected  
correspondence between Raman spectra and transcriptomes might also imply that  
similar multivariate analyses could find linkages between other types of non-destructive  
spectroscopic data such as whole-cell NMR [30,31] and omics data. It would be an  
important subject to explore such technical possibilities for future cell analysis study.

It is also intriguing that in *S. pombe*, ncRNAs are more linearly corresponded to  
Raman spectra than are mRNAs because ncRNAs do not contribute to proteomes  
directly. Our analysis reveals that snoRNAs and tRNAs had high VIP scores in *S.  
pombe* (Table 1). These ncRNAs are directly or indirectly involved in translational  
processes: For example, snoRNAs are known to be necessary for the maturation of

ribosomal RNAs [32,33]. Therefore, expression levels and the combined action of these 297  
ncRNAs may influence the translation of all proteins and consequently modulate global 298  
chemical composition of cells. Importantly, our results indicate that changes of mRNA 299  
expression levels in *S. pombe* across environment conditions are subtle relative to 300  
ncRNAs (Fig. 5D), which might have prevented us from finding a linear correspondence 301  
between Raman spectra and mRNA transcriptome subset. Note that our results do not 302  
exclude the possibility that mRNA profiles are linked to Raman spectra non-linearly. 303

On the other hand, ncRNAs are much less abundant in *E. coli*, and most of the 304  
transcripts with high VIP scores were mRNAs (Table 2). However, we found that the 305  
VIP list contained many transcripts coding ribosomal subunit proteins and ribosome 306  
modulating factors (Table 2). Taken together, our findings might indicate that 307  
alterations in translation machinery is one of the major cellular responses to 308  
environmental changes, and thus intimately linked to cellular global molecular 309  
compositions that are reflected in Raman spectra. 310

Our results showing that the transcriptome is low-dimensional indicate that 311  
intracellular gene expression is globally coupled and that expression-level changes of 312  
many genes occur in a coordinated manner. The degree of freedom in transcriptomes 313  
should therefore be severely limited, which has been in fact suggested in many 314  
microarray and sequencing studies [34–43]. Importantly, as shown in our study, such 315  
global changes of transcriptomes are associated with changes of cellular Raman spectra, 316  
which can now be monitored non-destructively at the single-cell level and in a snapshot 317  
manner. Furthermore, if the transformation parameter is known beforehand, one could 318  
estimate instantly the change of expression levels of each transcript from Raman spectra 319  
as conducted in Fig. 3. It should be noted that the low-dimensionality of 320  
transcriptomes was indispensable for our prediction because they were predicted based 321  
on dimension-reduced Raman spectra; changes of transcriptomes that require more 322  
dimensions than the total number of LDA axes are unpredictable in principle. 323  
Therefore, the fact that we could predict transcriptomes in a reasonably good precision 324  
in turn provides evidence for the low-dimensionality of transcriptomes. 325

Single-cell Raman microscopy is compatible with live-cell time-lapse imaging, though 326  
the photo-damage on cells by incident laser and background spectral noise from culture 327  
media must be carefully considered. Our results therefore indicate that single-cell 328

Raman spectra have the potential to provide omics information directly from living cells  
in a non-destructive and snapshot manner. Such *spectroscopic live-cell omics* studies  
would provide the way to investigate how global cellular states dynamically change in  
single living cells across diverse environmental conditions and cell types. If the  
Raman-transcriptome correspondence is further confirmed for other cell types,  
single-cell Raman microscopy could be applied to detecting distinct cells such as  
malignant cancers, pluripotent stem cells and antibiotic-resistant bacteria.

## Acknowledgments

We thank the National Institute for Materials Science, Molecule & Material Synthesis  
Platform, for sharing the Raman microscope facilities during the initial stage of this  
study; Joseph Kirschvink for reading the manuscript and valuable comments; Edo  
Kussell and members of the Wakamoto lab for in-depth discussions. This work was  
supported by the Platform for Dynamic Approaches to Living System from Ministry of  
Education, Culture, Sports, Science and Technology Japan and Japan Agency for  
Medical Research and Development (to Y.W. and K.O.); Japan Society for the  
Promotion of Science KAKENHI (grant number 15KT0075, 15H05746 to Y.W.); and  
Cooperative Research Grant of the Genome Research for BioResource, NODAI Genome  
Research Center, Tokyo University of Agriculture (to Y.K., S.Y.). K.J.K.-K. and K.N.  
was supported by Grant-in-Aid for Japan Society for the Promotion of Science Fellows  
(grant number 17J08992 and 17J07408).

## Author contributions

K.J.K.-K. and Y.W. conceived the work. K.J.K.-K. performed Raman measurements.  
K.J.K.-K. and H.N. designed the culture conditions and prepared the cell samples for *S.*  
*pombe* experiments. K.N., H.F. and H.M. designed the culture conditions and prepared  
the cell samples for *E. coli* experiments. K.J.K.-K. and A.O. obtained RNA-Seq  
transcriptome data for *S. pombe*. Y.K. and S.Y. obtained RNA-Seq transcriptome data  
for *E. coli*. K.J.K.-K. and K.F.K. analyzed data. K.J.K.-K., H.N., A.O., K.F.K., H.M.,  
K.O. and Y.W. evaluated the results and provided the interpretation. K.J.K.-K., K.F.K.

and Y.W. wrote the manuscript. All the authors read, commented on, and approved the manuscript.

357

358

## References

1. J. Jaumot, R. Gargallo, A. de Juan, and R. Tauler, “A graphical user-friendly interface for mcr-als: a new tool for multivariate curve resolution in matlab,” *Chemometrics and intelligent laboratory systems*, vol. 76, no. 1, pp. 101–110, 2005.
2. C. Ruckebusch, *Resolving Spectral Mixtures: With Applications from Ultrafast Time-Resolved Spectroscopy to Super-Resolution Imaging*, vol. 30. Elsevier, 2016.
3. I. W. Schie and T. Huser, “Methods and applications of raman microspectroscopy to single-cell analysis,” *Applied spectroscopy*, vol. 67, no. 8, pp. 813–828, 2013.
4. R. Smith, K. L. Wright, and L. Ashton, “Raman spectroscopy: an evolving technique for live cell studies,” *Analyst*, vol. 141, no. 12, pp. 3590–3600, 2016.
5. R. Zenobi, “Single-cell metabolomics: analytical and biological perspectives,” *Science*, vol. 342, no. 6163, p. 1243259, 2013.
6. L. Wei, F. Hu, Y. Shen, Z. Chen, Y. Yu, C.-C. Lin, M. C. Wang, and W. Min, “Live-cell imaging of alkyne-tagged small biomolecules by stimulated raman scattering,” *Nature methods*, vol. 11, no. 4, pp. 410–412, 2014.
7. R. Goodacre, E. M. Timmins, R. Burton, N. Kaderbhai, A. M. Woodward, D. B. Kell, and P. J. Rooney, “Rapid identification of urinary tract infection bacteria using hyperspectral whole-organism fingerprinting and artificial neural networks,” *Microbiology*, vol. 144, pp. 1157–1170, 1998.
8. W. Huang, R. Griffiths, and I. Thompson, “Raman microscopic analysis of single microbial cells,” *Analytical Chemistry*, 2004.
9. H. J. Butler, L. Ashton, B. Bird, G. Cinque, K. Curtis, J. Dorney, K. Esmonde-White, N. J. Fullwood, B. Gardner, P. L. Martin-Hirsch, *et al.*, “Using raman spectroscopy to characterize biological materials,” *Nature protocols*, vol. 11, no. 4, pp. 664–687, 2016.

10. T. Ichimura, L. D. Chiu, K. Fujita, S. Kawata, T. M. Watanabe, T. Yanagida, and H. Fujita, “Visualizing cell state transition using raman spectroscopy,” *PLoS ONE*, vol. 9, no. 1, 2014.
11. K. Hamada, K. Fujita, N. I. Smith, M. Kobayashi, Y. Inouye, and S. Kawata, “Raman microscopy for dynamic molecular imaging of living cells.,” *Journal of biomedical optics*, vol. 13, no. 4, p. 044027, 2015.
12. L. Teng, X. Wang, X. Wang, H. Gou, L. Ren, T. Wang, Y. Wang, Y. Ji, W. E. Huang, and J. Xu, “Label-free, rapid and quantitative phenotyping of stress response in e. coli via ramanome,” *Sci Reports*, vol. 6, no. 1, p. 34359, 2016.
13. V. Wood, M. A. Harris, M. D. McDowall, K. Rutherford, B. W. Vaughan, D. M. Staines, M. Aslett, A. Lock, J. Bähler, P. J. Kersey, *et al.*, “Pombase: a comprehensive online resource for fission yeast,” *Nucleic acids research*, vol. 40, no. D1, pp. D695–D699, 2011.
14. M. D. McDowall, M. A. Harris, A. Lock, K. Rutherford, D. M. Staines, J. Bähler, P. J. Kersey, S. G. Oliver, and V. Wood, “Pombase 2015: updates to the fission yeast database,” *Nucleic acids research*, vol. 43, no. D1, pp. D656–D661, 2014.
15. P. Gromski, H. Muhamadali, D. Ellis, Y. Xu, E. Correa, M. Turner, and R. Goodacre, “A tutorial review: Metabolomics and partial least squares-discriminant analysis - a marriage of convenience or a shotgun wedding,” *Analytica Chimica Acta*, pp. 10–23, 2015.
16. A. Boulesteix and K. Strimmer, “Partial least squares: a versatile tool for the analysis of high-dimensional genomic data,” *Brief Bioinform*, vol. 8, no. 1, pp. 32–44, 2007.
17. P. Geladi and B. R. Kowalski, “Partial least-squares regression: a tutorial,” *Anal Chim Acta*, vol. 185, pp. 1–17, 1986.
18. R. A. Fisher, *The design of experiments*. Oliver And Boyd; Edinburgh; London, 1937.

19. E. J. Pitman, "Significance tests which may be applied to samples from any populations," *Supplement to the Journal of the Royal Statistical Society*, vol. 4, no. 1, pp. 119–130, 1937.
20. B. Phipson and G. K. Smyth, "Permutation p-values should never be zero: calculating exact p-values when permutations are randomly drawn," *Statistical applications in genetics and molecular biology*, vol. 9, no. 1, 2010.
21. S. Wold, E. Johansson, and M. Cocchi, "Pls-partial least squares projections to latent structures," *3D QSAR in drug design*, vol. 1, pp. 523–550, 1993.
22. T. Mehmood, K. Liland, L. Snipen, and S. Sæbø, "A review of variable selection methods in partial least squares regression," *Chemometr Intell Lab*, vol. 118, pp. 62–69, 2012.
23. M. Tao and A. Huberman, "Some properties of Escherichia coli adenylyl cyclase.," *Archives of biochemistry and biophysics*, vol. 141, no. 1, pp. 236–40, 1970.
24. R. L. Perlman and I. Pastan, "Pleiotropic deficiency of carbohydrate utilization in an adenylyl cyclase deficient mutant of Escherichia coli.," *Biochemical and biophysical research communications*, vol. 37, no. 1, pp. 151–7, 1969.
25. R. Milo and R. Phillips, *Cell Biology by the Numbers*. Garland Science, 2015.
26. F. F. Delgado, N. Cermak, V. C. Hecht, S. Son, Y. Li, S. M. Knudsen, S. Olcum, J. M. Higgins, J. Chen, W. H. Grover, *et al.*, "Intracellular water exchange for measuring the dry mass, water mass and changes in chemical composition of living cells," *PloS one*, vol. 8, no. 7, p. e67590, 2013.
27. J. R. Mourant, K. W. Short, S. Carpenter, N. Kunapareddy, L. Coburn, T. M. Powers, and J. P. Freyer, "Biochemical differences in tumorigenic and nontumorigenic cells measured by Raman and infrared spectroscopy," *Journal of Biomedical Optics*, vol. 10, no. 3, p. 031106, 2005.
28. N. Kunapareddy, J. P. Freyer, and J. R. Mourant, "Raman spectroscopic characterization of necrotic cell death," *Journal of Biomedical Optics*, vol. 13, no. 5, p. 054002, 2008.

29. K. Yugi, H. Kubota, A. Hatano, and S. Kuroda, “Trans-Omics: How To Reconstruct Biochemical Networks Across Multiple ‘Omic’ Layers,” *Trends in Biotechnology*, vol. 34, no. 4, pp. 276–290, 2016.
30. R. Nygaard, J. A. Romaniuk, D. M. Rice, and L. Cegelski, “Spectral snapshots of bacterial cell-wall composition and the influence of antibiotics by whole-cell nmr,” *Biophysical journal*, vol. 108, no. 6, pp. 1380–1389, 2015.
31. E. Luchinat and L. Banci, “In-cell nmr: a topical review,” *IUCrJ*, vol. 4, no. 2, pp. 108–118, 2017.
32. T. Kiss, “Small nucleolar RNAs: an abundant group of noncoding RNAs with diverse cellular functions.,” *Cell*, vol. 109, no. 2, pp. 145–8, 2002.
33. W. Filipowicz and V. Pogacíc, “Biogenesis of small nucleolar ribonucleoproteins.,” *Current opinion in cell biology*, vol. 14, no. 3, pp. 319–27, 2002.
34. F. Oszolak and P. M. Milos, “RNA sequencing: advances, challenges and opportunities.,” *Nature reviews. Genetics*, vol. 12, no. 2, pp. 87–98, 2011.
35. S. Marguerat, A. Schmidt, S. Codlin, W. Chen, R. Aebersold, and J. Bähler, “Quantitative analysis of fission yeast transcriptomes and proteomes in proliferating and quiescent cells,” *Cell*, vol. 151, no. 3, pp. 671–683, 2012.
36. I. Carter-O’Connell, M. T. Peel, D. D. Wykoff, and E. K. O’Shea, “Genome-wide characterization of the phosphate starvation response in *Schizosaccharomyces pombe*.,” *BMC genomics*, vol. 13, no. 1, p. 697, 2012.
37. A. P. Gasch, P. T. Spellman, C. M. Kao, O. Carmel-Harel, M. B. Eisen, G. Storz, D. Botstein, and P. O. Brown, “Genomic expression programs in the response of yeast cells to environmental changes.,” *Molecular biology of the cell*, vol. 11, no. 12, pp. 4241–57, 2000.
38. M. J. Amorim, C. Cotobal, C. Duncan, and J. Mata, “Global coordination of transcriptional control and mRNA decay during cellular differentiation.,” *Molecular systems biology*, vol. 6, p. 380, 2010.



39. V. M. Boer, J. H. de Winde, J. T. Pronk, and M. D. W. Piper, “The genome-wide transcriptional responses of *Saccharomyces cerevisiae* grown on glucose in aerobic chemostat cultures limited for carbon, nitrogen, phosphorus, or sulfur.,” *The Journal of biological chemistry*, vol. 278, no. 5, pp. 3265–74, 2003.
40. M. J. Brauer, C. Huttenhower, E. M. Airoidi, R. Rosenstein, J. C. Matese, D. Gresham, V. M. Boer, O. G. Troyanskaya, and D. Botstein, “Coordination of growth rate, cell cycle, stress response, and metabolic activity in yeast.,” *Molecular biology of the cell*, vol. 19, no. 1, pp. 352–67, 2008.
41. D. Chen, W. M. Toone, J. Mata, R. Lyne, G. Burns, K. Kivinen, A. Brazma, N. Jones, and J. Bähler, “Global transcriptional responses of fission yeast to environmental stress,” *Molecular biology of the cell*, vol. 14, no. 1, pp. 214–229, 2003.
42. G. Heimberg, R. Bhatnagar, H. El-Samad, and M. Thomson, “Low dimensionality in gene expression data enables the accurate extraction of transcriptional programs from shallow sequencing,” *Cell systems*, vol. 2, no. 4, pp. 239–250, 2016.
43. S. Biswas, K. Kerner, P. J. P. L. Teixeira, J. L. Dangl, V. Jojic, and P. A. Wigge, “Tradict enables accurate prediction of eukaryotic transcriptional states from 100 marker genes,” *Nature Communications*, vol. 8, 2017.
44. T. Baba, T. Ara, M. Hasegawa, Y. Takai, Y. Okumura, M. Baba, K. A. Datsenko, M. Tomita, B. L. Wanner, and H. Mori, “Construction of *Escherichia coli* K-12 in-frame, single-gene knockout mutants: the Keio collection,” *Molecular systems biology*, vol. 2, no. 1, 2006.
45. F. Huang, T. M. Hartwich, R. F. E. Y. Lin, W. C. Duim, J. J. Long, P. D. Uchil, J. R. Myers, M. A. Baird, W. Mothes, M. W. Davidson, D. Toomre, and J. Bewersdorf, “Video-rate nanoscopy using sCMOS camera-specific single-molecule localization algorithms,” *Nat Methods*, vol. 10, no. 7, pp. 653–658, 2013.
46. A. Savitzky and M. J. Golay, “Smoothing and differentiation of data by simplified least squares procedures.,” *Analytical chemistry*, vol. 36, no. 8, pp. 1627–1639, 1964.

47. J. Galipon, A. Miki, A. Oda, T. Inada, and K. Ohta, “Stress-induced Incrnas evade nuclear degradation and enter the translational machinery,” *Genes to Cells*, vol. 18, no. 5, pp. 353–368, 2013.
48. D. Kim, G. Pertea, C. Trapnell, H. Pimentel, R. Kelley, and S. L. Salzberg, “Tophat2: accurate alignment of transcriptomes in the presence of insertions, deletions and gene fusions,” *Genome biology*, vol. 14, no. 4, p. R36, 2013.
49. C. Trapnell, B. A. Williams, G. Pertea, A. Mortazavi, G. Kwan, M. J. Van Baren, S. L. Salzberg, B. J. Wold, and L. Pachter, “Transcript assembly and quantification by rna-seq reveals unannotated transcripts and isoform switching during cell differentiation,” *Nature biotechnology*, vol. 28, no. 5, pp. 511–515, 2010.
50. C. Trapnell, D. G. Hendrickson, M. Sauvageau, L. Goff, J. L. Rinn, and L. Pachter, “Differential analysis of gene regulation at transcript resolution with rna-seq,” *Nature biotechnology*, vol. 31, no. 1, pp. 46–53, 2013.
51. M. Riley, T. Abe, M. B. Arnaud, M. K. Berlyn, F. R. Blattner, R. R. Chaudhuri, J. D. Glasner, T. Horiuchi, I. M. Keseler, T. Kosuge, *et al.*, “Escherichia coli k-12: a cooperatively developed annotation snapshot-2005,” *Nucleic acids research*, vol. 34, no. 1, pp. 1–9, 2006.
52. E. I. Boyle, S. Weng, J. Gollub, H. Jin, D. Botstein, J. M. Cherry, and G. Sherlock, “Go:: Termfinder-open source software for accessing gene ontology information and finding significantly enriched gene ontology terms associated with a list of genes,” *Bioinformatics*, vol. 20, no. 18, pp. 3710–3715, 2004.
53. G. O. Consortium *et al.*, “The gene ontology (go) database and informatics resource,” *Nucleic acids research*, vol. 32, no. suppl 1, pp. D258–D261, 2004.

## Materials and Methods

### *S. pombe* strain and culture conditions

A haploid strain, 972 h<sup>-</sup>, was used for all *S. pombe* experiments. Initially, cells were cultured at 30°C in Yeast Extract (YE) (Bacto Yeast Extract (Becton Dickinson and Co)) + 3% glucose liquid medium until OD<sub>600</sub> =0.7-1.0. Then, cell cultures were inoculated to the following stress conditions in liquid cultures: YE + 1 mM CdSO<sub>4</sub>, YE + 1 M Sorbitol, YE + 2 mM H<sub>2</sub>O<sub>2</sub>, heat shock in a water bath at 39°C for an hour. For the other stress conditions, cell cultures were washed three times with the media EMM-N, EMM-C, EMM 2% Glucose, EMM 0.1% Glucose, YE + 10% EtOH (Table S1), and cultured in each medium at 30°C for 24 hours.

Prior to Raman microscopy measurements, cells from each stress condition were washed with phosphate buffered saline (PBS) three times, and fixed with 2% formaldehyde in PBS for an hour at 4°C. Then, cells were washed once with PBS + 100 mM glycine to quench the free aldehyde, and twice with PBS. Subsequently, all samples were stored at 4°C until they were measured.

### *E. coli* strains and culture conditions

*E. coli* MG1655  $\Delta$ *cyaA* strain was constructed by P1 transduction from BW25113  $\Delta$ *cyaA* strain in Keio collection [44]. The deletion of *cyaA* ORF was verified after isolation by genome sequencing.

*E. coli* MG1655 strain was cultured in 10 mL L-broth (1.0% Bacto Tryptone (Becton Dickinson and Co.), 0.5% Bacto Yeast Extract (Becton Dickinson and Co.) and 0.5% NaCl). MG1655  $\Delta$ *cyaA* strain was cultured in 10 mL L-broth containing 0, 0.1, 0.5 or 1.0 mM cAMP. Cells were grown at 37°C to late exponential phase (OD<sub>660</sub>=0.8). Prior to Raman microscopy measurements, cells were washed twice with physiological saline.

### Raman microscopy

Raman spectra of cells were obtained with a custom-built Raman microscope where a commercial Raman imaging system (STR-Raman, AIRIX corp.) was integrated into a Nikon Ti-E microscope. A 532 nm, continuous-wave diode-pumped solid-state laser

(Gem 532, Laser Quantum) was used as excitation. For *S. pombe*, a 60×/NA 1.2 water immersion objective lens (Olympus, UPLSAPO 60XW) was used at 4 mW power at the sample stage. For *E. coli*, a 100×/NA 0.9 air objective lens (Olympus, MPLN 100X) was used at 18 mW power. Backscattered Raman signals were focused through a 100  $\mu\text{m}$  pinhole, dispersed by a spectrometer (Acton SP2300i, Princeton Instruments) equipped with a 300 gr/mm grating, and detected with a sCMOS camera (Orca Flash 4.0 v2, Hamamatsu Photonics). To reduce dark noise, the sCMOS camera was water-cooled at 15°C. The exposure time of each cell was 10 seconds.

Unlike CCD detectors, sCMOS detectors have pixel-dependent readout noise that must be reduced for actual use in Raman microscopy. To address this, a sCMOS specific noise reduction filter inspired by [45] was implemented. All of the following analyses were conducted by scripts written in Matlab 2017a. First, 10,000 blank, 2048  $\times$  2048 pixel images with exposure time of 10 seconds were obtained to characterize the noise distribution of each pixel. The offset  $o_i$  and variance  $\text{var}_i$  of pixel  $i$  were calculated as follows:

$$o_i = \frac{1}{M} \sum_{m=1}^M s_i^m, \quad (5)$$

$$\text{var}_i = \frac{1}{M} \sum_{m=1}^M (s_i^m)^2 - o_i^2, \quad (6)$$

where  $M$  is the total number of images taken (in this case  $M = 10,000$ ),  $m$  is the frame number of obtained dark images and  $s_i^m$  is the analog-to-digital unit (ADU) count of pixel  $i$  at frame  $m$ . An offset subtraction for each pixel was conducted, and a 2-dimensional convolution filter was applied to obtained images as follows:

$$\text{unif}(D_i, n) = \frac{\sum_{i \in C_{n \times n}} \left[ \frac{(D_i - o_i)}{\text{var}_i} \right]}{\sum_{i \in C_{n \times n}} \text{var}_i^{-1}}, \quad (7)$$

where  $D_i$  is the ADU count of each pixel,  $n$  is the number of pixels per window size and  $C_{n \times n}$  represents the kernel region which is a  $n \times n$  square box centered around pixel  $i$ . In our study,  $n = 3$ . In essence, this convolution filter assigns a weighted average to pixel counts, where pixels with low variances are given higher weights than those with high variances. After applying the convolution filter, the region of the spectrum in the

image was cropped, and the sum of pixel counts along the direction perpendicular to the wavenumber was calculated to obtain a Raman spectrum. The wavenumber was calibrated referencing the standard Raman spectrum of ethanol, and spectral regions of 632 to 1873  $\text{cm}^{-1}$  was used for all subsequent multivariate analyses (2  $\text{cm}^{-1}$  per pixel). Furthermore, each spectrum was smoothed by the Savitzky-Golay filter [46], and normalized by subtracting the mean and dividing it by its standard deviation.

For preparing *S. pombe* samples for Raman measurements, 1  $\mu\text{L}$  of cell suspension was placed on a synthetic quartz slide glass put in place with a synthetic quartz cover glass (TOSHIN RIKO CO., LTD). The rims of the coverslips were sealed with Vaseline to prevent evaporation during measurements. The center of 15-26 cells were measured for every sample, and three biological replicates were obtained, which resulted in a total of 54-76 cell measurements per each environment condition.

For *E. coli*, 5  $\mu\text{L}$  of cell suspension was placed on a synthetic quartz slide glass, and air dried for 5-10 minutes. 15 cells were measured for every sample, and three biological replicates were obtained, which resulted in a total of 45 cell measurements per each condition. 5 background spectra for each slide glass were obtained, and the average was subtracted from obtained cellular spectra.

### ***S. pombe* RNA sequencing and data processing**

For *S. pombe* RNA-seq, two biological replicates were measured. 50 mL cell cultures of each environmental condition were prepared as described above. Each culture was pelleted down, and quickly frozen with liquid nitrogen. The total RNA was extracted as described in [47], followed by a DNA removal (RQ1 DNase, Promega) and a ribosome RNA removal by the Ribo-Zero Gold rRNA Removal kit for yeast (Illumina Inc.). Sequencing libraries were prepared using NEBNext Ultra Directional RNA Library Prep Kit for Illumina (NEB) following the manufacturer's instructions. 150 bp paired-end sequencing was conducted with MiSeq (Illumina Inc.). Raw RNA-seq reads were mapped on to the reference genome of 972 h<sup>-</sup> *S. pombe* (ASM294v2) from PomBase [13, 14] by TopHat2 [48], and FPKMs of annotated genes and noncoding transcripts were calculated by Cufflinks 2.0 [49, 50].

### ***E. coli* RNA sequencing and data processing**

For *E. coli* RNA-seq, three biological replicates were measured. In the preparation of RNAs, RNAProtect Bacteria Reagent (Qiagen N.V.) was added to exponential phase cultures, and then, cells were lysed using lysozyme (SEIKAGAKU Co.). Then, the total RNA was extracted from the lysates using an RNeasy mini kit (Qiagen N.V.) and RNase-free DNase set (Qiagen N.V.) following the manufacturer's instructions. Sequencing libraries were prepared by the NEBNext mRNA library prep kit for Illumina (NEB) with the following modifications. The random hexamer primer was used for reverse transcription. After second strand synthesis, double stranded cDNA was fragmented to an average length of 300 bp using a Covaris S2 sonication system (Covaris Inc.). One hundred cycles of paired-end sequencing were carried out using HiSeq 2500 system (Illumina Inc.) following the manufacturer's instructions. After the sequencing reactions were complete, the Illumina analysis pipeline (CASAVA 1.8.0) was used to process the raw sequencing data. RNA-seq reads were trimmed using CLC Genomics Workbench ver. 8.5.1 (Qiagen N.V.) with the following parameters; Phred quality score >30; Removing terminal 15 nucleotides from 5' end and 3 nucleotides from 3' end; Removing truncated reads less than 30 nucleotides length. Trimmed reads were mapped to all genes in *E. coli* strain MG1655 (accession number: NC\_000913.3) using CLC Genomics Workbench ver. 8.5.1 (Qiagen N.V.) with the following parameters; Length fraction: 0.7; Similarity fraction: 0.9; Maximum number of hits for a read: 1. The expression level of each gene was calculated by counting the mapped reads to each gene and were normalized by calculating the values of FPKM. All transcripts were annotated from [51].

### **Principal component-linear discriminant analysis (PC-LDA)**

To reduce systematic-error and dimensions of cellular Raman spectra, we conducted principal component-linear discriminant analysis (PC-LDA). In short, PC-LDA is a supervised classification technique that combines principal component analysis (PCA) and linear discriminant analysis (LDA) to find the most discriminatory bases while avoiding over-fitting. PCA is first applied to the original high-dimensional Raman spectra to reduce noise and dimension, which simultaneously reduces over-fitting and

enables conducting the following LDA analysis against high-dimensional data [7, 8, 12]. In our study, for both *S. pombe* and *E. coli*, we used principal components that in total explained 98% of the variance of the original Raman spectra. Then, against the chosen principal components, LDA takes into account the culture-condition assignments and extracts the most discriminatory bases by maximizing the ratio of the between-group variance to the sum of within-group variances in the lower dimensional space.

To test how well PC-LDA was able to classify cellular Raman spectra, 1/6-th of the spectra from every environment condition was excluded from the calculation of the discriminatory bases, projected on to the PC-LDA space, and classified by the maximum likelihood method. It was assumed that single-cell Raman spectra in the PC-LDA space from each environment followed a Gaussian distribution, and the excluded Raman spectra were classified as the environment which gave the highest likelihood. For *S. pombe*, the classification accuracy was 90.6%, and for *E. coli*, 65.7%.

## Prediction of Raman spectra and transcriptomes by partial least squares regression (PLS-R)

To evaluate the linearity between dimension reduced and environment averaged Raman spectra and transcriptomes, we conducted a leave-one-out cross-validation. One measurement from environment  $\mathcal{E}_i$  was removed, and PLS-R was applied to conduct a linear regression against the remaining data set. Specifically, this equates to finding a matrix  $\mathbf{A}_{-i}$  such that

$$\mathbf{R}_{-i} = \mathbf{A}_{-i}\mathbf{T}_{-i} + \mathbf{E}_{-i} \quad (8)$$

where  $\mathbf{R}_{-i} = [\mathbf{r}'_{\mathcal{E}_1, -i}, \dots, \mathbf{r}'_{\mathcal{E}_{i-1}, -i}, \mathbf{r}'_{\mathcal{E}_{i+1}, -i}, \dots, \mathbf{r}'_{\mathcal{E}_N, -i}]$ ,

$\mathbf{T}_{-i} = [\mathbf{t}_{\mathcal{E}_1}, \dots, \mathbf{t}_{\mathcal{E}_{i-1}}, \mathbf{t}_{\mathcal{E}_{i+1}}, \dots, \mathbf{t}_{\mathcal{E}_N}]$  and  $\mathbf{E}_{-i}$  is the error matrix. Here,  $\mathbf{r}'_{\mathcal{E}, -i}$  are the dimension reduced Raman spectra where PC-LDA against Raman spectra excluding environment  $i$  was applied. Also,  $\mathbf{r}'_{\mathcal{E}, -i}$  and  $\mathbf{t}_{\mathcal{E}}$  are mean centered by subtracting the average of the included  $N - 1$  conditions. Now, when  $N - 1 < \dim \mathbf{t}_{\mathcal{E}}$ , ordinary least squares regression cannot be conducted to find  $\mathbf{A}_{-i}$  (In our study, for *S. pombe*,  $N - 1 = 9 < \dim \mathbf{t}_{\mathcal{E}} = 6560$  and for *E. coli*,  $N - 1 = 4 < \dim \mathbf{t}_{\mathcal{E}} = 4349$ ). Therefore, we applied PLS-R, which reduces the dimension of  $\mathbf{t}_{\mathcal{E}}$  to below  $N - 1$  so that a linear regression can be conducted, while retaining the linearity between  $\mathbf{r}'_{\mathcal{E}, -i}$  and  $\mathbf{t}_{\mathcal{E}}$  [15–17].

For all PLS-R analyses in this study, the dimensions were reduced to  $N - 3$ .

Consequently, in our attempt in Fig. 2F to find the required numbers of transcripts to observe a linear correspondence, the number of included transcripts was increased from  $N - 3 = 10 - 3 = 7$ .

Once  $\mathbf{A}_{-i}$  is estimated,  $\mathbf{r}'_{\mathcal{E}_i, -i}$  can be estimated as  $\hat{\mathbf{r}}'_{\mathcal{E}_i, -i} = \hat{\mathbf{A}}_{-i} \hat{\mathbf{t}}_{\mathcal{E}_i}$ . However,  $\hat{\mathbf{r}}'_{\mathcal{E}_i, -i}$  is predicted on to the PC-LDA space where environment  $\mathcal{E}_i$  is excluded. Therefore, this space is not designed to evaluate Raman spectra obtained from environment  $\mathcal{E}_i$ . Thus, to evaluate the estimated spectra, the basis of  $\hat{\mathbf{r}}'_{\mathcal{E}_i, -i}$  was changed to the PC-LDA space including environment  $\mathcal{E}_i$  by  $\hat{\mathbf{r}}'_{\mathcal{E}_i} = \mathbf{C}_{-i} \hat{\mathbf{r}}'_{\mathcal{E}_i, -i}$ .  $\mathbf{C}_{-i}$  was calculated as  $\mathbf{C}_{-i} = [\mathbf{r}'_{\mathcal{E}_1}, \dots, \mathbf{r}'_{\mathcal{E}_{i-1}}, \mathbf{r}'_{\mathcal{E}_{i+1}}, \dots, \mathbf{r}'_{\mathcal{E}_N}] \mathbf{R}_{-i}^\dagger$ , where  $\mathbf{R}_{-i}^\dagger$  is the Moore-Penrose pseudoinverse of  $\mathbf{R}_{-i}$ . This was repeated for all  $i = 1, \dots, N$ , and  $\text{PRESS}_r$  was calculated.

To predict the transcriptome of environment  $\mathcal{E}_i$ , we obtained the Moore-Penrose pseudoinverse of  $\hat{\mathbf{A}}_{-i}$  denoted as  $\hat{\mathbf{A}}_{-i}^\dagger$ , and predicted it as  $\hat{\mathbf{t}}_{\mathcal{E}_i} = \hat{\mathbf{A}}_{-i}^\dagger \mathbf{r}'_{\mathcal{E}_i}$ . Note that in general, the estimate of transcriptome  $\hat{\mathbf{t}}_{\mathcal{E}_i}$  that satisfies  $\mathbf{r}'_{\mathcal{E}_i} = \hat{\mathbf{A}}_{-i} \hat{\mathbf{t}}_{\mathcal{E}_i}$  is

$$\hat{\mathbf{t}}_{\mathcal{E}_i} = \hat{\mathbf{A}}_{-i}^\dagger \mathbf{r}'_{\mathcal{E}_i} + (\mathbf{I} - \hat{\mathbf{A}}_{-i}^\dagger \hat{\mathbf{A}}_{-i}) \mathbf{v} \quad (9)$$

where  $\mathbf{v}$  is an arbitrary vector, meaning that  $\hat{\mathbf{t}}_{\mathcal{E}_i}$  in principle cannot be determined uniquely from  $\mathbf{r}'_{\mathcal{E}_i}$ . However,  $\hat{\mathbf{A}}_{-i}^\dagger \mathbf{r}'_{\mathcal{E}_i}$  is the term that can be determined experimentally. Also, the terms  $\hat{\mathbf{A}}_{-i}^\dagger \mathbf{r}'_{\mathcal{E}_i}$  and  $(\mathbf{I} - \hat{\mathbf{A}}_{-i}^\dagger \hat{\mathbf{A}}_{-i}) \mathbf{v}$  are orthogonal ( $\langle \hat{\mathbf{A}}_{-i}^\dagger \mathbf{r}'_{\mathcal{E}_i}, (\mathbf{I} - \hat{\mathbf{A}}_{-i}^\dagger \hat{\mathbf{A}}_{-i}) \mathbf{v} \rangle = 0$ ), meaning that removing the term  $(\mathbf{I} - \hat{\mathbf{A}}_{-i}^\dagger \hat{\mathbf{A}}_{-i}) \mathbf{v}$  does not affect the subspace spanned by  $\hat{\mathbf{A}}_{-i}^\dagger \mathbf{r}'_{\mathcal{E}_i}$ . Therefore, we estimated  $\hat{\mathbf{t}}_{\mathcal{E}_i}$  by  $\hat{\mathbf{t}}_{\mathcal{E}_i} = \hat{\mathbf{A}}_{-i}^\dagger \mathbf{r}'_{\mathcal{E}_i}$ . Again, this was repeated for all  $i = 1, \dots, N$ , and  $\text{PRESS}_t$  was calculated.

VIP scores in Table 1 and 2, and explained variances by the number of dimensions used in Fig 3A were calculated as the average of  $i = 1, \dots, N$  when conducting the above leave-one-out cross-validation.



## Evaluating the significance of Raman-transcriptome linearity by the permutation test

To test the significance of the Raman-transcriptome linearity, we conducted the permutation test [18,19]. In short, false data sets were created by randomly permuting environmental assignments of transcriptomes,  $\text{PRESS}_r$  or  $\text{PRESS}_t$  values were calculated, and  $p$ -values of accidentally obtaining PRESS values equal to or lower than the original value were obtained.

When the number of environment conditions  $N$  is larger than 8, the number of possible random permutations exceeds  $8! = 40,320$ , and becomes computationally intensive to calculate  $p$ -values. Therefore, when  $N \geq 8$ , unless otherwise stated,  $p$ -values were calculated by randomly generating 10,000 permutations, and when  $N < 8$ , all possible permutations were generated.  $p$ -values calculated from randomly generated permutations are known to underestimate exact  $p$ -values [20]. Therefore, when  $N \geq 8$ ,  $p$ -values were calculated by applying the following correction:  $(b + 1)/(m + 1)$  where  $b$  is the number of permutations that gave PRESS values equal to or lower than the original PRESS value, and  $m$  is the total number of permutations [20].
